# Supplementary material
Source: PubMed Central journal article supplement (PMC3389199)

## Supplementary Data

### Assay and Inhibition of Diacylglycerol Lipase Activity

Meghan Johnston, Shachi R. Bhatt, Surina Sikka, Richard W. Mercier, Jay M. West, Alexandros Makriyannis, S. John Gatley, and Richard I. Duclos, Jr.

### Table of Contents

- S2** Structures and names of standard chemicals referred to in the paper
- S3-5** New ether lipid analogs of lead compounds RHC80267 **1** and O-3841 **2**
- S6** Western blot of hDAGL $\alpha$  and mDAGL $\beta$  proteins from the Scripps group
- S7** Purity of [ $^{14}\text{C}$ ]SAG substrate by TLC with phosphorimaging analysis
- S8** Radio-TLC assay data for inhibitors **3 - 8** (100 nM and 10 nM) of mDAGL $\alpha$
- S9** DMSO solubilizes FRET reporter substrate **17** for hDAGL $\alpha$  hydrolysis
- S10** Evaluation of FRET reporter substrates **17- 22** with hDAGL $\alpha$
- S11** Inhibition of hDAGL $\alpha$  activity by THL **3** in the FRET assay with reporter **17**
- S12-14** Characterizations of **3 - 11, 17, and 18**
- S15-25**  $^1\text{H}$  NMR spectra of **3 - 11, 17, and 18**

**FP-fluorescein (fluorophosphoryl-fluorescein)**

5-(3-(5-(10-(ethoxyfluorophosphoryl)decanamido)pentyl)thioureido)-2-(6-hydroxy-3-oxo-3*H*-xanthen-9-yl)benzoic acid

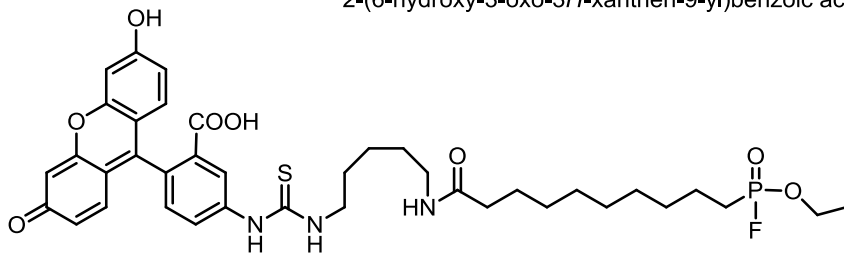

**PMSF**

phenylmethylsulfonyl fluoride

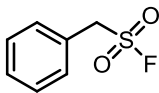

**O-5596**

1-(fluoro(methyl)phosphoryloxy)-3-*tert*-butoxypropan-2-yl oleate

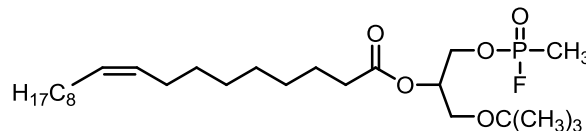

***n*-C<sub>16</sub>H<sub>33</sub>SO<sub>2</sub>F (SYL374)**

palmitylsulfonyl fluoride

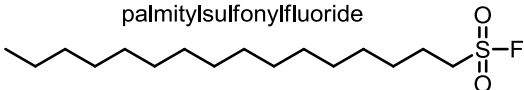

**JZL184**

4-nitrophenyl-4-[bis(1,3-benzodioxol-5-yl)(hydroxy)methyl]piperidine-1-carboxylate

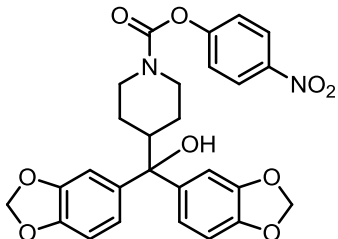

**SD41**

*N*-carbobenzoxy-L-serine β-lactone

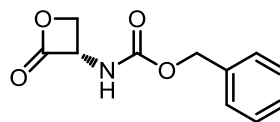

**JZL195**

(4-nitrophenyl) 4-[(3-phenoxyphenyl)methyl]piperazine-1-carboxylate

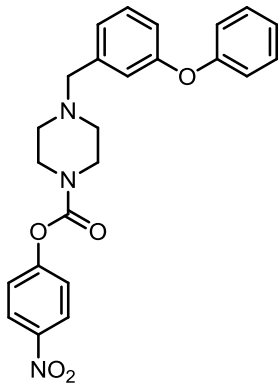

**URB597**

[3-(3-carbamoylphenyl)phenyl] *N*-cyclohexylcarbamate

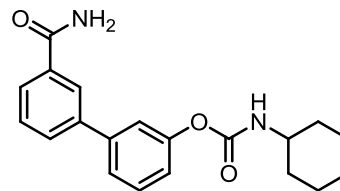

Ether lipid analogs of lead compound O-3841 **2** were synthesized including analogs that had the reactive carbamate group of RHC80267 **1**. The 3-O-methyl glycerol derivatives MRJ1, MRJ4, MRJ5, and MRJ6 were synthesized utilizing the tritylation, silyl ether protection, and detritylation conditions developed in the Roush laboratory (Tortosa, et al. *JACS* **2008**, *130*, 2722 and Tortosa et al. *JOC* **2008**, *73*, 9657).

These compounds were not inhibitors of hDAGL $\alpha$  or mDAGL $\alpha$  at 10  $\mu$ M. These compounds each had a  $K_i$  above 1  $\mu$ M in competition binding assays for CB1 (rat brain preparation) and for CB2 (mouse or human receptor expressed in HEK293). They also did not inhibit rFAAH or hMAGL.

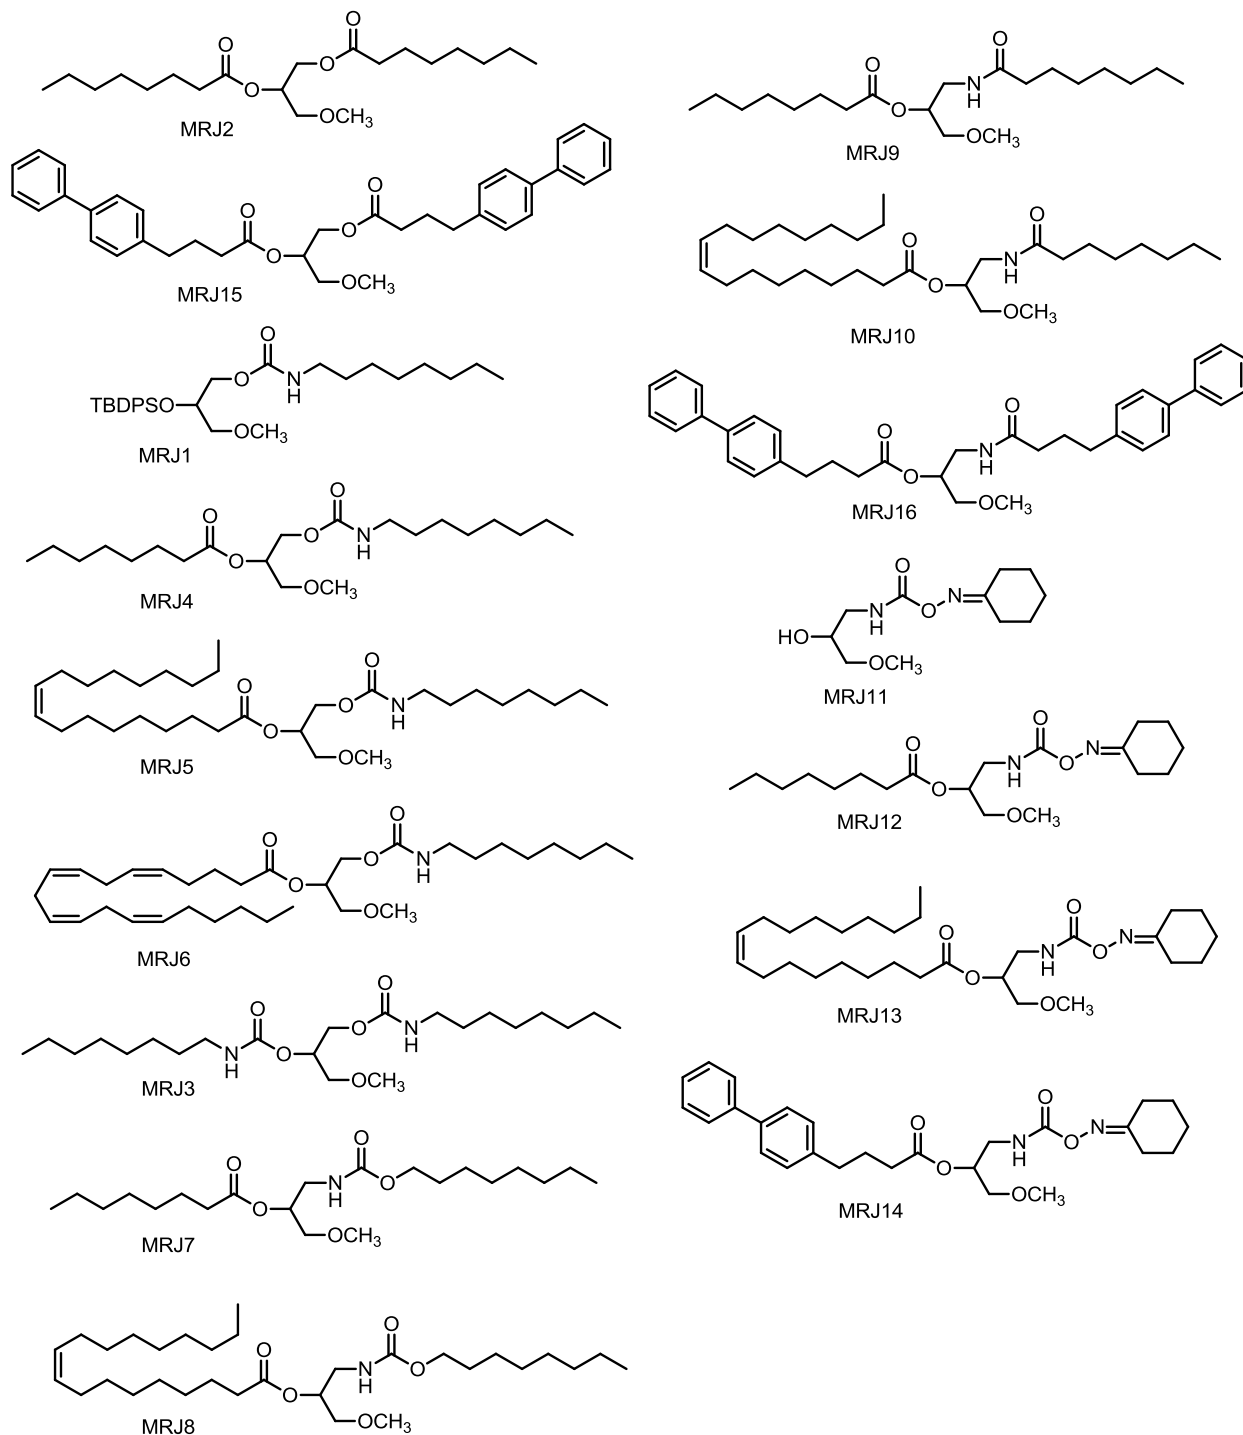

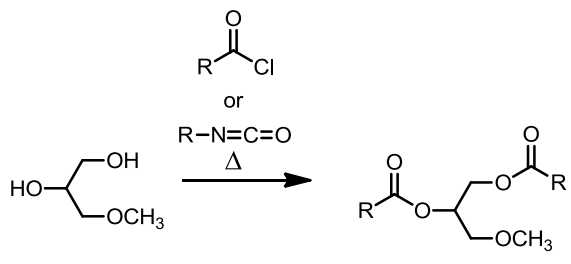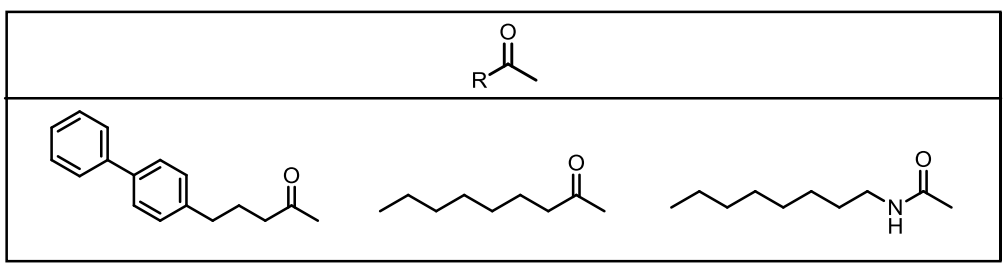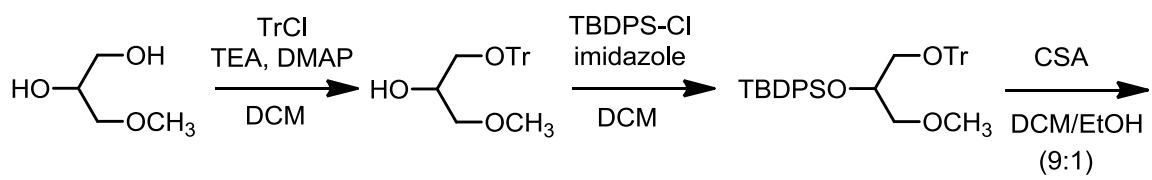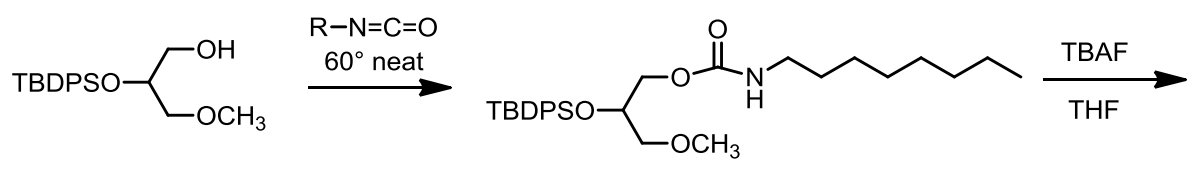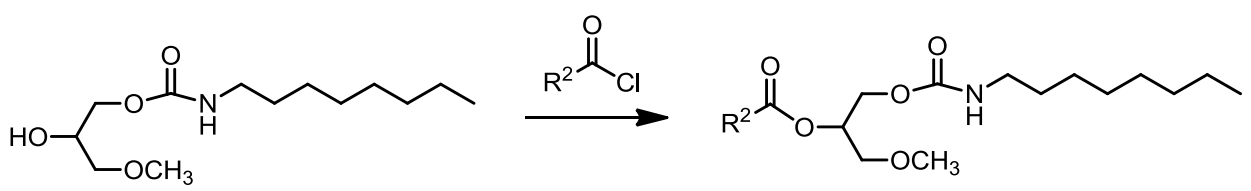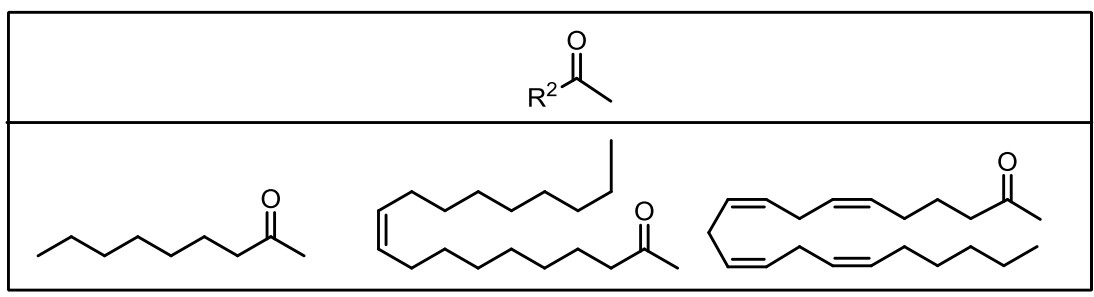

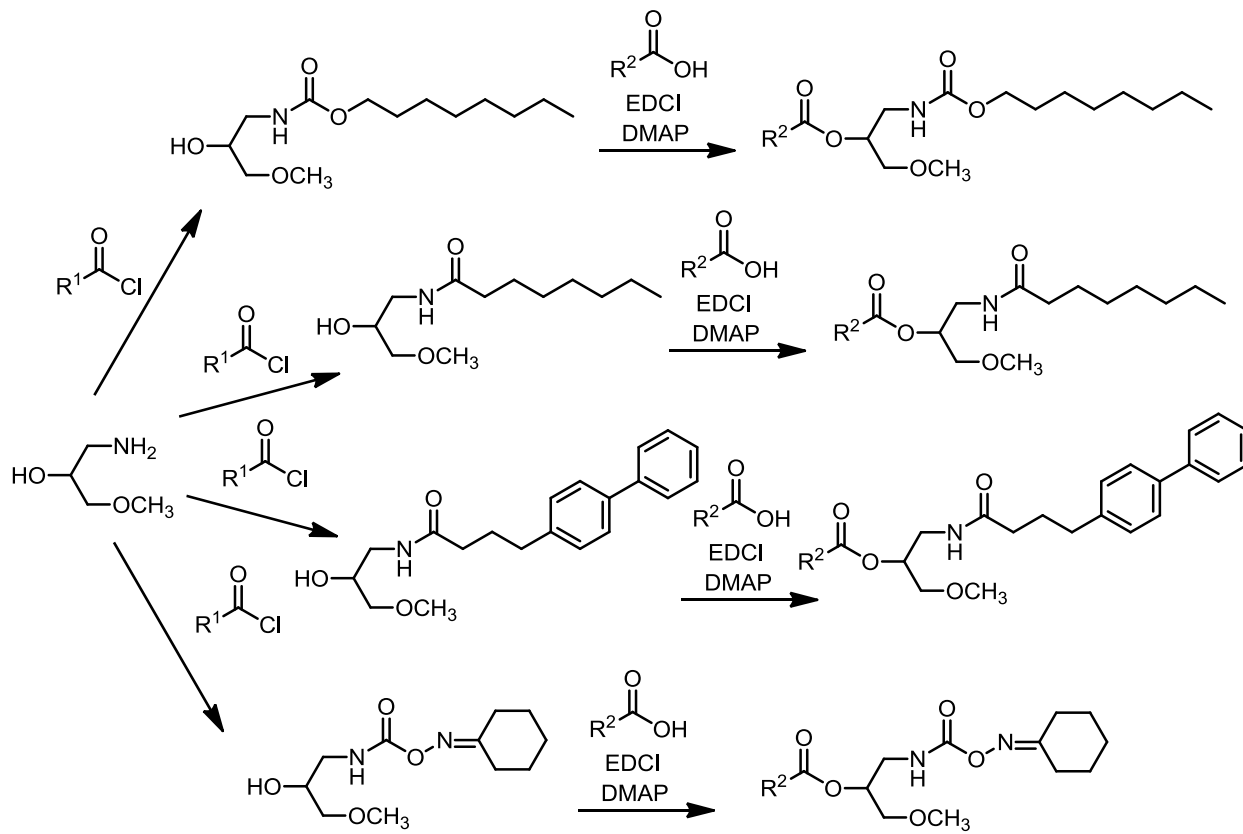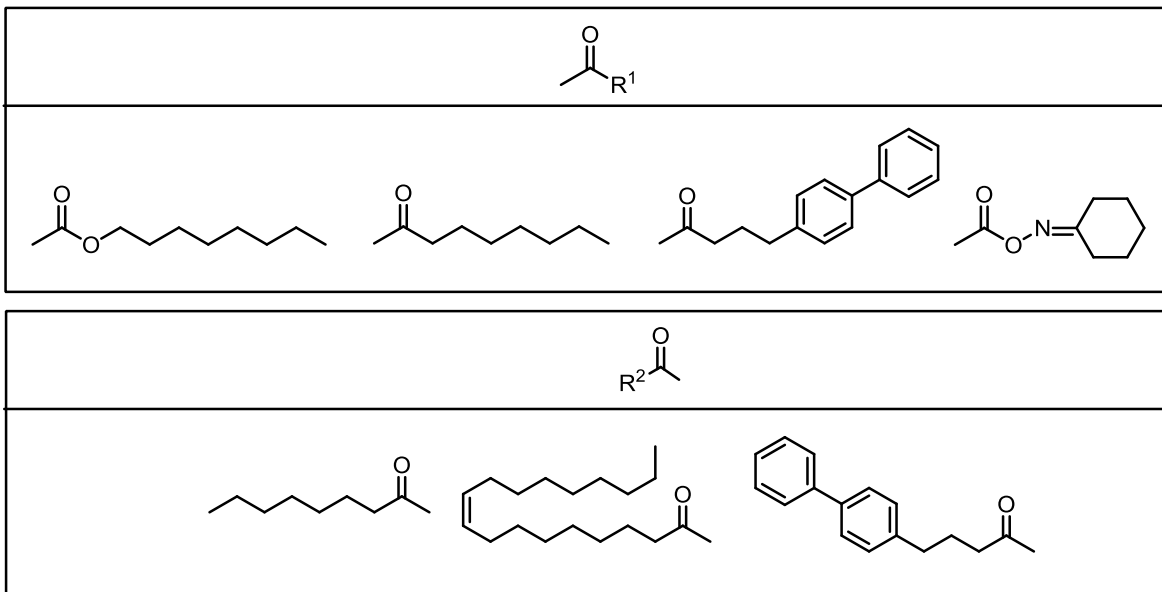

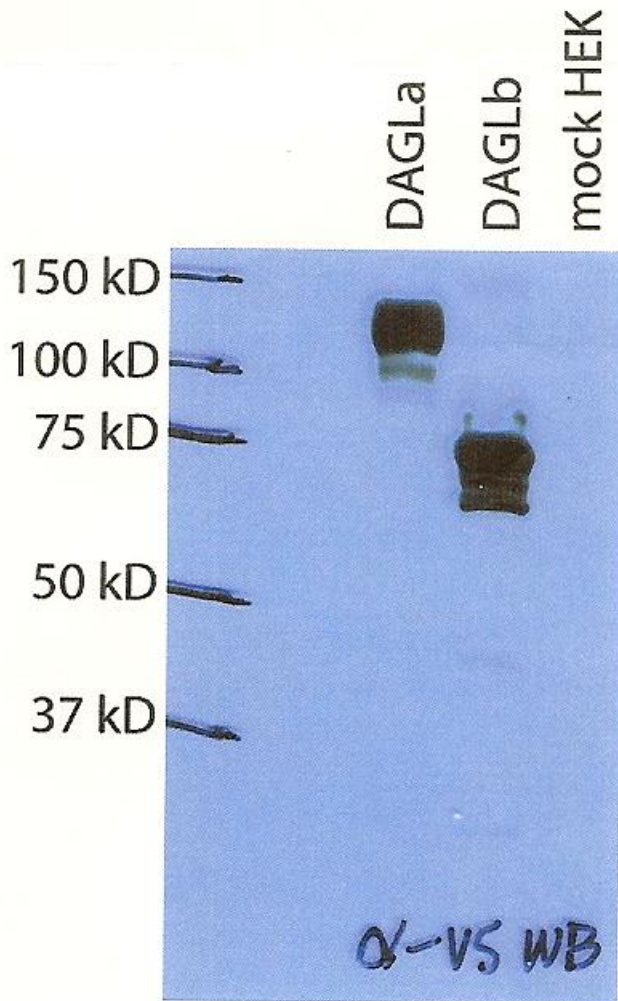

hDAGL $\alpha$  and mDAGL $\beta$  cDNA sequences were both subcloned into the pcDNA3.1-V5-HIS-TOPO vector. The corresponding plasmids and mock (empty pcDNA3.1) were transfected into HEK293T according to the manufacturer's protocol and cell lysates analyzed by PAGE. Western blot with anti-V5 was used by the Scripps group to confirm expression.

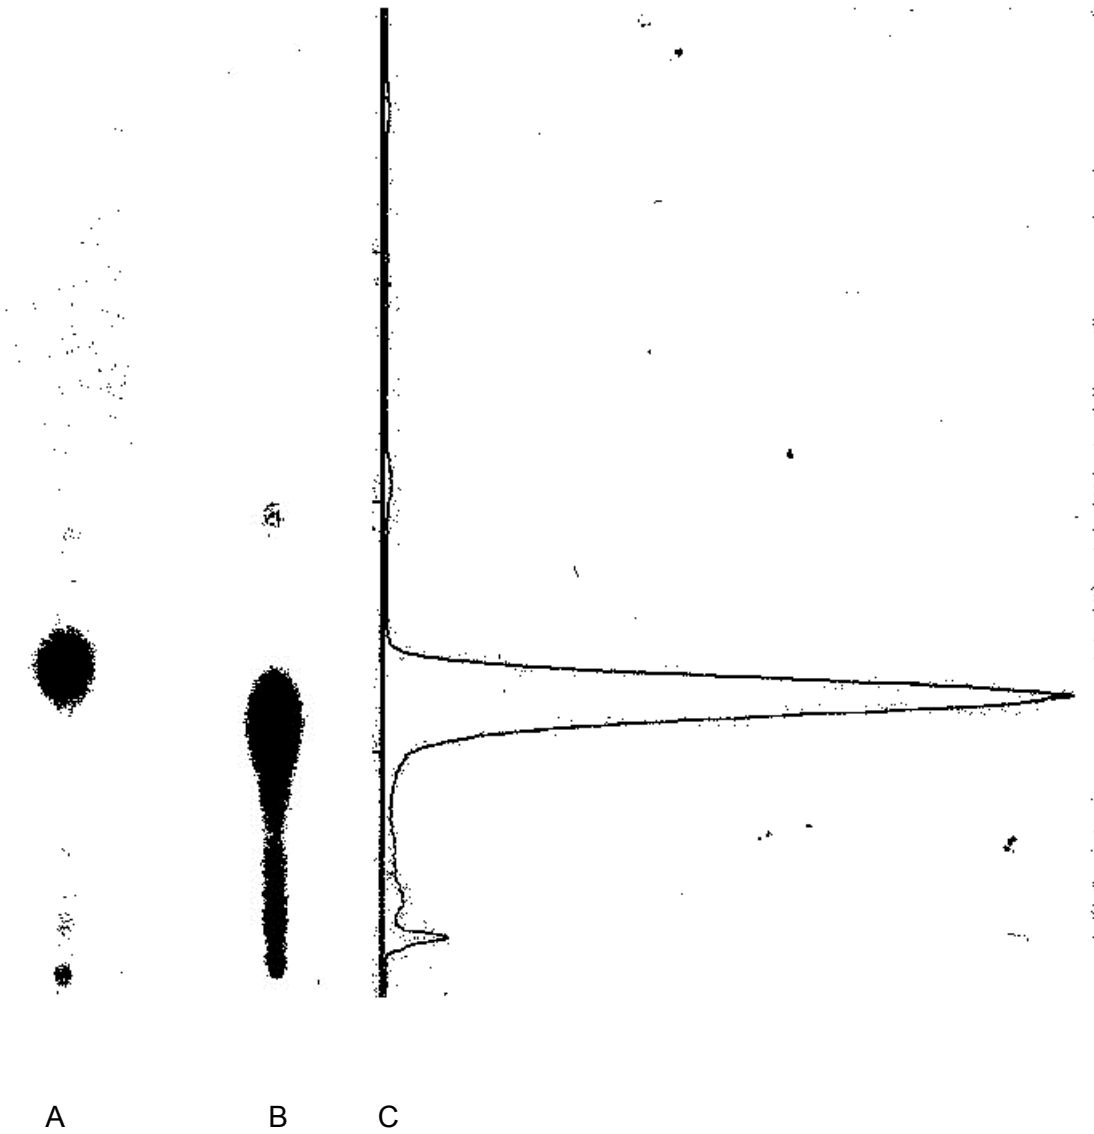

**A.** [ $1'''$ - $^{14}\text{C}$ ]1-Stearoyl-2-arachidonoyl-*sn*-glycerol ( $^{14}\text{C}$ ]SAG) 20,000 DPM eluted (4:96 acetone/chloroform) on TLC (silica gel) with a 1 h exposure. **B.** [ $1'''$ - $^{14}\text{C}$ ]1-Stearoyl-2-arachidonoyl-*sn*-glycerol ( $^{14}\text{C}$ ]SAG) 9,400 DPM eluted (4:96 acetone/chloroform) on TLC (boric acid treated silica gel plate,  $R_f = 0.21$ ) with a 15 h exposure, and **C** shows the profile of this lane with less than 0.5% 1(3)-diglyceride rearrangement byproduct [ $1'''$ - $^{14}\text{C}$ ]1-stearoyl-3-arachidonoyl-*sn*-glycerol ( $R_f = 0.42$ ) present upon quantitative phosphorimaging analysis.

# mDAGL- $\alpha$ Inhibition by Compounds 3-8

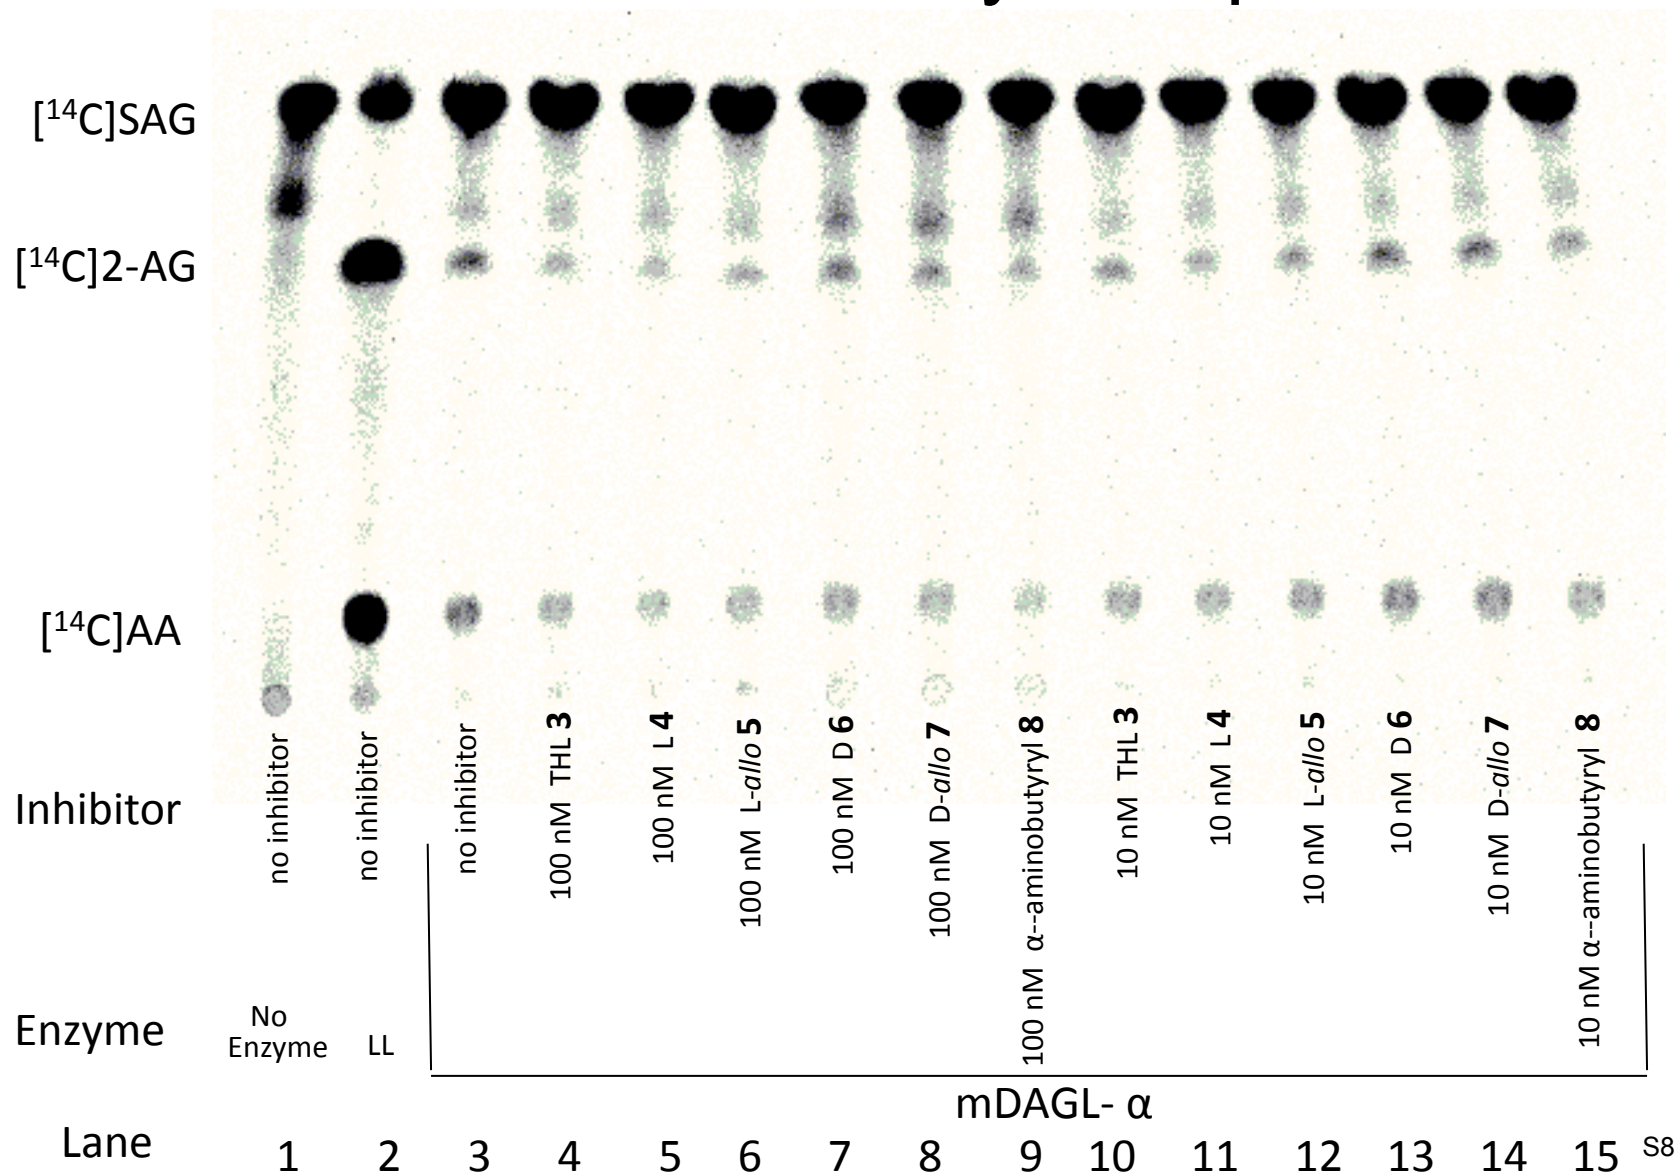



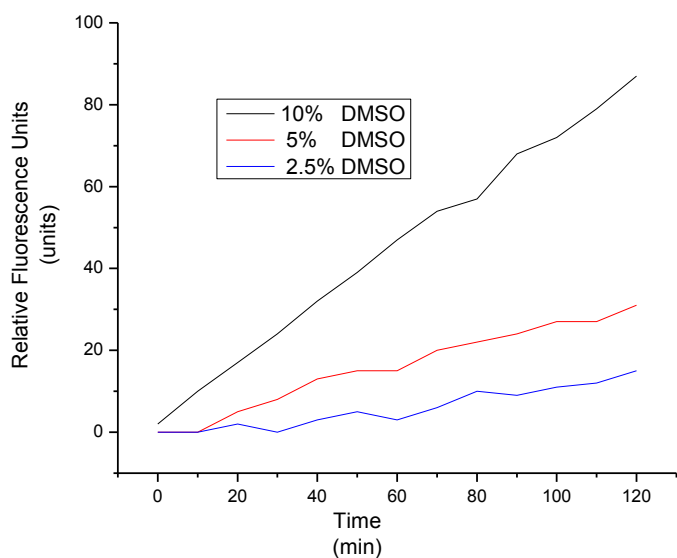

Cell lysate of hDAGL $\alpha$  expression with reporter compound **17** showing the effect of DMSO to solubilize the lipid substrate. No increase in activity was observed at DMSO concentrations above 10% (data not shown). The same effect on solubilization of substrate with DMSO for lipoprotein lipase was observed (data not shown).

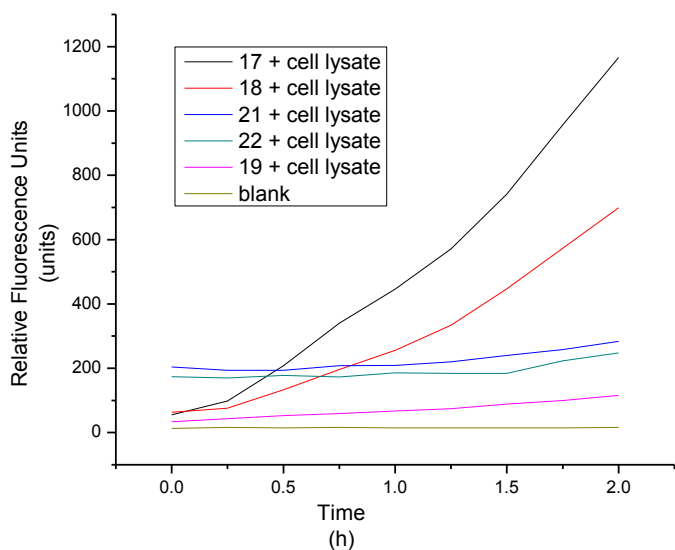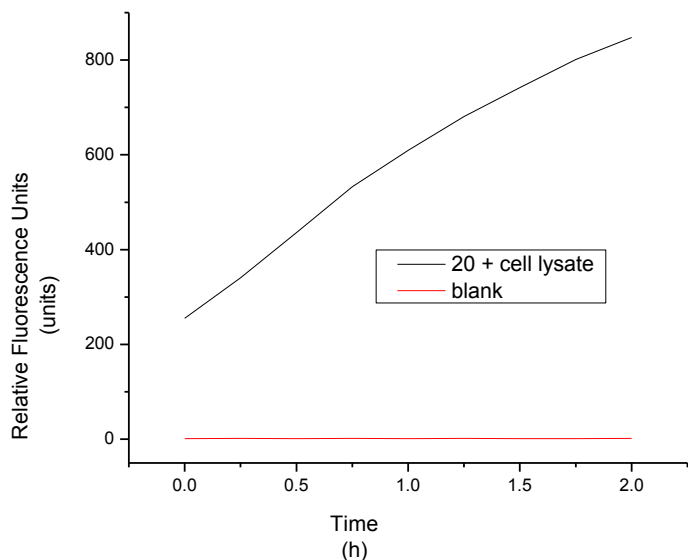

Reporter compounds as substrates for hDAGL $\alpha$  activity with HEK293T cell lysates in the presence of 10% DMSO. Top, pyrenyl analogs **17**, **18**, **19**, **21**, and **22** (EX 320 nm, EM 400 nm). Bottom, NBD analog **20** (EX 485 nm, EM 535 nm).

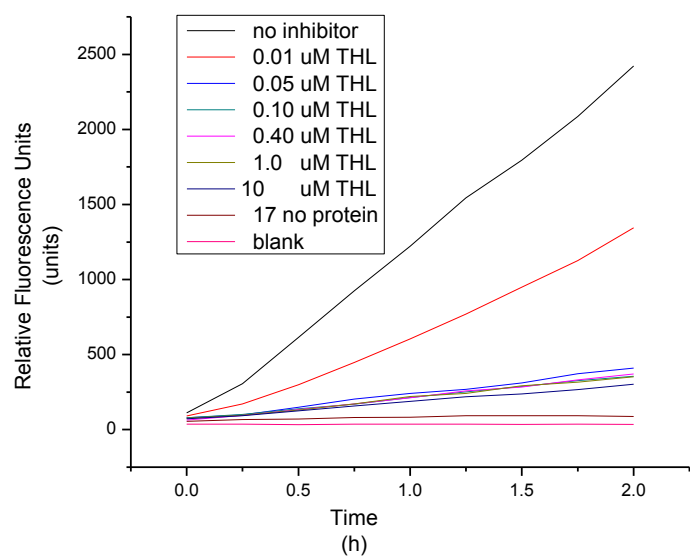

Inhibition of hDAGL $\alpha$  activity by THL **3**. Also note the stability of reporter compound **17** under the assay conditions.

All compounds were white solids (unless otherwise noted) and had the expected IR absorbance peaks. Observed rotations were too low to be accurately determined at the 0.1 g/ 100 mL CH<sub>2</sub>Cl<sub>2</sub> concentrations used. All proton NMR spectra were in CDCl<sub>3</sub> at 500 MHz. No previous publication of THL **3** to our knowledge has noted the small percentage of *trans-N*-formate present that does not interconvert with the *cis-N*-formate isomer at temperatures below the decomposition temperatures for THL and the related β-lactones. We were not able to chromatographically isolate the *cis* and *trans* formates, nor separate **D-*allo***-isoleucyl analog **7** from the **D**-isoleucyl analog **6**.

**3** THL mp 41-42 °C; <sup>1</sup>H NMR δ 0.88 (t, *J* = 6.4 Hz, 3 H), 0.89 (t, *J* = 6.4 Hz, 3 H), 0.97 (d, *J* = 5.9 Hz, 3 H), 0.98 (d, *J* = 5.9 Hz, 3 H), 1.22 - 1.50 (m, 27 H), 1.50 - 1.87 (m, 6 H), 2.00 (ddd, *J* = 15.1, 4.9, 4.9 Hz, 1 H), 2.17 (ddd, *J* = 15.2, 7.8, 7.8 Hz, 1 H), 3.22 (ddd, *J* = 7.3, 7.3, 3.9 Hz, 1 H), 4.29 (ddd, *J* = 7.8, 4.9, 3.9 Hz, 1 H), 4.70 (ddd, *J* = 9.0, 8.6, 4.9 Hz, 1 H), 5.00 - 5.06 (m, 1 H), 5.89 (d, *J* = 8.4 Hz, 1 H), 8.22 (s, 1 H). *trans* isomer 0.95 (d, *J* = 7.8 Hz, 0.15 H), 4.10 (ddd, *J* = 9.8, 9.7, 4.4 Hz, 0.05 H), 5.05 - 5.11 (m, 0.05 H), 5.72 (dd, *J* = 11.7, 10.3 Hz, 0.05 H), 8.06 (d, *J* = 11.7 Hz, 0.05 H).

**4** L-isoleucyl analog (OMDM188) mp 59-60 °C; lit. (Ortar et al. *JMC* **2008**, 51, 6970) mp 57-59 °C; <sup>1</sup>H NMR δ 0.88 (t, *J* = 7.3 Hz, 3 H), 0.89 (t, *J* = 7.3 Hz, 3 H), 0.96 (t, *J* = 7.8 Hz, 3 H), 0.97 (d, *J* = 7.8 Hz, 3 H), 1.10 - 1.60 (m, 28 H), 1.58 - 1.84 (m, 4 H), 1.85 - 2.00 (m, 1 H), 2.02 (ddd, *J* = 15.0, 4.5, 4.5 Hz, 1 H), 2.19 (ddd, *J* = 14.9, 7.7, 7.7 Hz, 1 H), 3.24 (ddd, *J* = 7.4, 7.4, 4.2 Hz, 1 H), 4.29 (ddd, *J* = 7.7, 4.5, 4.2 Hz, 1 H), 4.68 (dd, *J* = 8.8, 4.9 Hz, 1 H), 5.00 - 5.07 (m, 1 H), 6.05 (d, *J* = 8.8 Hz, 1 H), 8.26 (s, 1 H). *trans* isomer 0.99 (d, *J* = 7.8 Hz, 0.15 H), 3.97 (dd, *J* = 10.2, 4.9 Hz, 0.05 H), 5.06 - 5.11 (m, 0.05 H), 5.87 (dd, *J* = 11.7, 10.3 Hz, 0.05 H), 8.03 (d, *J* = 11.7 Hz, 0.05 H).

**5** L-*allo*-isoleucyl analog (MRJ27) mp 49-50 °C; <sup>1</sup>H NMR δ 0.87 (t, *J* = 7.3 Hz, 3 H), 0.88 (t, *J* = 7.3 Hz, 3 H), 0.96 (t, *J* = 7.6 Hz, 3 H), 0.97 (d, *J* = 7.6 Hz, 3 H), 1.14 - 1.52 (m, 28 H), 1.54 - 1.88 (m, 4 H), 1.92 - 2.00 (m, 1 H), 2.02 (ddd, *J* = 15.1, 5.4, 5.4 Hz, 1 H), 2.19 (ddd, *J* = 15.1, 7.7, 7.5 Hz, 1 H), 3.23 (ddd, *J* = 7.6, 7.6, 3.9 Hz, 1 H), 4.29 (ddd, *J* = 7.6, 5.4, 3.9 Hz, 1 H), 4.77 (dd, *J* = 9.0, 3.7 Hz, 1 H), 4.96 - 5.05 (m, 1 H), 6.10 (d, *J* = 8.8 Hz, 1 H), 8.26 (s, 1 H). *trans* isomer 4.07 (dd, *J* = 10.2, 3.9 Hz, 0.05 H), 5.04 - 5.11 (m, 0.05 H), 6.01 (dd, *J* = 11.7, 10.3 Hz, 0.05 H), 8.00 (d, *J* = 11.7 Hz, 0.05 H).

**6** D-isoleucyl analog (MRJ29) clear and colorless liquid; <sup>1</sup>H NMR δ 0.89 (t, *J* = 6.6 Hz, 6 H), 0.95 (t, *J* = 7.3 Hz, 3 H), 0.97 (d, *J* = 7.3 Hz, 3 H), 1.14 - 1.52 (m, 28 H), 1.54 - 1.88 (m, 4 H), 1.92 - 2.00 (m, 1 H), 2.03 (ddd, *J* = 14.9, 4.5, 4.5 Hz, 1 H), 2.19 (ddd, *J* = 14.9, 7.9, 6.5 Hz, 1 H), 3.24 (ddd, *J* = 7.4, 7.4, 4.2 Hz, 1 H), 4.34 (ddd, *J* = 7.9, 4.5, 4.2 Hz, 1 H), 4.66 (dd, *J* = 8.6, 4.6 Hz, 1 H), 5.01 - 5.08 (m, 1 H), 6.03 (d, *J* = 8.8 Hz, 1 H), 8.25 (s, 1

H). *trans* isomer 1.00 (t,  $J = 7.3$  Hz, 0.15 H), 2.05 (ddd,  $J = 14.9, 4.5, 4.5$  Hz, 0.05 H), 3.24 (ddd,  $J = 7.4, 7.4, 4.2$  Hz, 0.05 H), 3.99 (dd,  $J = 10.3, 4.3$  Hz, 0.05 H), 4.26 - 4.32 (m, 0.05 H), 5.09 - 5.17 (m, 0.05 H), 5.98 (dd,  $J = 11.7, 10.3$  Hz, 0.05 H), 8.02 (d,  $J = 11.7$  Hz, 0.05 H). D-isoleucine has second 5% impurity of D-*allo*-isoleucine from starting amino acid 4.77 (dd,  $J = 9.0, 3.7$  Hz, 0.05 H), 5.98 (d,  $J = 8.8$  Hz, 0.05 H), 8.27 (s, 0.05 H).

**7** D-*allo*-isoleucyl analog (MRJ30) clear and colorless liquid;  $^1\text{H NMR } \delta$  0.85 - 0.90 (m, 9 H), 0.97 (t,  $J = 7.3$  Hz, 3 H), 1.16 - 1.51 (m, 28 H), 1.52 - 1.87 (m, 4 H), 1.91 - 2.01 (m, 1 H), 2.02 (ddd,  $J = 15.0, 5.0, 4.9$  Hz, 1 H), 2.19 (ddd,  $J = 15.0, 7.7, 7.1$  Hz, 1 H), 3.23 (ddd,  $J = 7.4, 7.3, 3.9$  Hz, 1 H), 4.33 (ddd,  $J = 7.7, 5.0, 3.9$  Hz, 1 H), 4.77 (dd,  $J = 9.0, 3.7$  Hz, 1 H), 5.00 - 5.08 (m, 1 H), 5.96 (d,  $J = 8.8$  Hz, 1 H), 8.27 (s, 1 H). *trans* isomer 0.96 (t,  $J = 7.3$  Hz, 0.15 H), 2.13 (m, 0.05 H), 3.17 - 3.22 (m, 0.05 H), 4.08 (dd,  $J = 10.0, 3.7$  Hz, 0.05 H), 4.26 - 4.32 (m, 0.05 H), 5.09 - 5.17 (m, 0.05 H), 5.87 (dd,  $J = 11.7, 10.0$  Hz, 0.05 H), 8.00 (d,  $J = 11.7$  Hz, 0.05 H).

**8**  $\alpha$ -Aminobutyryl analog (MRJ28) mp 43-44 °C;  $^1\text{H NMR } \delta$  0.88 (t,  $J = 6.7$  Hz, 3 H), 0.89 (t,  $J = 6.7$  Hz, 3 H), 0.96 (t,  $J = 7.6$  Hz, 3 H), 1.20 - 1.54 (m, 26 H), 1.54 - 1.90 (m, 5 H), 1.92 - 2.01 (m, 1 H), 2.02 (ddd,  $J = 15.1, 4.4, 4.4$  Hz, 1 H), 2.17 (ddd,  $J = 15.1, 7.9, 7.8$  Hz, 1 H), 3.23 (ddd,  $J = 7.4, 7.4, 4.2$  Hz, 1 H), 4.30 (ddd,  $J = 8.0, 4.5, 4.4$  Hz, 1 H), 4.64 (ddd,  $J = 7.3, 7.3, 7.3$  Hz, 1 H), 5.02 - 5.09 (m, 1 H), 6.10 (d,  $J = 7.3$  Hz, 1 H), 8.25 (s, 1 H). *trans* isomer 1.00 (t,  $J = 7.6$  Hz, 0.15 H), 4.03 (ddd,  $J = 9.8, 7.8, 5.4$  Hz, 0.05 H), 5.07 - 5.13 (m, 0.05 H), 5.87 (dd,  $J = 11.7, 9.8$  Hz, 0.05 H), 8.08 (d,  $J = 11.7$  Hz, 0.05 H).

**9**  $\beta$ -Tridecyl- $\beta$ -lactone (racemic, RID13) mp 39-40 °C;  $^1\text{H NMR } \delta$  0.88 (t,  $J = 6.8$  Hz, 3 H), 1.21 - 1.51 (m, 22 H), 1.69 - 1.79 (m, 1 H), 1.82 - 1.92 (m, 1 H), 3.06 (dd,  $J = 16.4, 4.2$  Hz, 1 H), 3.50 (dd,  $J = 16.1, 5.9$  Hz, 1 H), 4.50 (ddd,  $J = 11.5, 6.0, 6.0$  Hz, 1 H).

**10** *trans*- $\beta$ -Lactone (racemic, MRJ18) clear and colorless liquid;  $^1\text{H NMR } \delta$  0.89 (t,  $J = 6.8$  Hz, 6 H), 1.20 - 1.50 (m, 18 H), 1.66 - 1.77 (m, 2 H), 1.77 - 1.95 (m, 2 H), 3.16 (ddd,  $J = 8.7, 6.4, 4.1$  Hz, 1 H), 4.21 (ddd,  $J = 6.7, 6.7, 4.1$  Hz, 1 H).

**11** *cis*- $\beta$ -Lactone (racemic, MRJ17) clear and colorless liquid;  $^1\text{H NMR } \delta$  0.89 (t,  $J = 6.8$  Hz, 6 H), 1.20 - 1.47 (m, 16 H), 1.45 - 1.58 (m, 2 H), 1.59 - 1.71 (m, 2 H), 1.71 - 1.85 (m, 2 H), 3.60 (ddd,  $J = 8.9, 6.8, 6.8$  Hz, 1 H), 4.54 (ddd,  $J = 9.7, 6.1, 4.2$  Hz, 1 H).

**17** 1-DNP-2-pyrenyl ether lipid (MRJ20) viscous yellow semi-solid;  $^1\text{H NMR } \delta$  1.20 - 1.32 (m, 2 H), 1.46 (quintet,  $J = 7.5$  Hz, 2 H), 1.59 (quint,  $J = 7.6$  Hz, 2 H), 2.14 - 2.26 (m, 2 H), 2.30 (t,  $J = 7.3$  Hz, 2 H), 2.54 (t,  $J =$

7.1 Hz, 2 H), 2.89 (apparent q,  $J = 7.3$  Hz, 2 H), 3.39 (s, 3 H), 3.34 - 3.44 (m, 2 H), 3.55 (dd,  $J = 10.7, 5.1$  Hz, 1 H), 3.58 (dd,  $J = 10.7, 5.1$  Hz, 1 H), 4.22 (dd,  $J = 12.2, 7.3$  Hz, 1 H), 4.44 (dd,  $J = 12.0, 3.2$  Hz, 1 H), 5.31-5.38 (m, 1 H), 6.37 (d,  $J = 9.8$  Hz, 1 H), 7.85 (d,  $J = 7.8$  Hz, 1 H), 7.90 - 8.01 (m, 4 H), 8.05 - 8.18 (m, 5 H), 8.28 (d,  $J = 9.3$  Hz, 1 H), 8.89 (d,  $J = 2.9$  Hz, 1 H).

**18** 1-Pyrenyl-2-DNP ether lipid (MRJ21) viscous yellow semi-solid;  $^1\text{H}$  NMR  $\delta$  1.21-1.30 (m, 2 H), 1.44 (quintet,  $J = 7.4$  Hz, 2 H), 1.58 (quintet,  $J = 7.6$  Hz, 2 H), 2.18 (quintet,  $J = 7.4$  Hz, 2 H), 2.32 (t,  $J = 7.3$  Hz, 2 H), 2.48 (t,  $J = 7.3$  Hz, 2 H), 2.83 (dd,  $J = 13.2, 7.3$  Hz, 2 H), 3.36 (s, 3 H), 3.32 - 3.38 (m, 2 H), 3.52 (dd,  $J = 10.7, 5.4$  Hz, 2 H), 3.54 (dd,  $J = 10.7, 5.4$  Hz, 2 H), 4.21 (dd,  $J = 12.0, 6.6$  Hz, 1 H), 4.43 (dd,  $J = 12.2, 3.4$  Hz, 1 H), 5.23-5.30 (m, 1 H), 6.28 (d,  $J = 9.3$  Hz, 1 H), 7.82 (d,  $J = 7.3$  Hz, 1 H), 7.85 (dd,  $J = 9.5, 2.7$  Hz, 1 H), 7.90 - 7.97 (m, 3 H), 8.02 - 8.12 (m, 5 H), 8.23 (d,  $J = 9.3$  Hz, 1 H), 8.83 (d,  $J = 2.4$  Hz, 1 H).

(3) Tetrahydrolipstatin (THL)  
N-formyl-L-leucyl ester

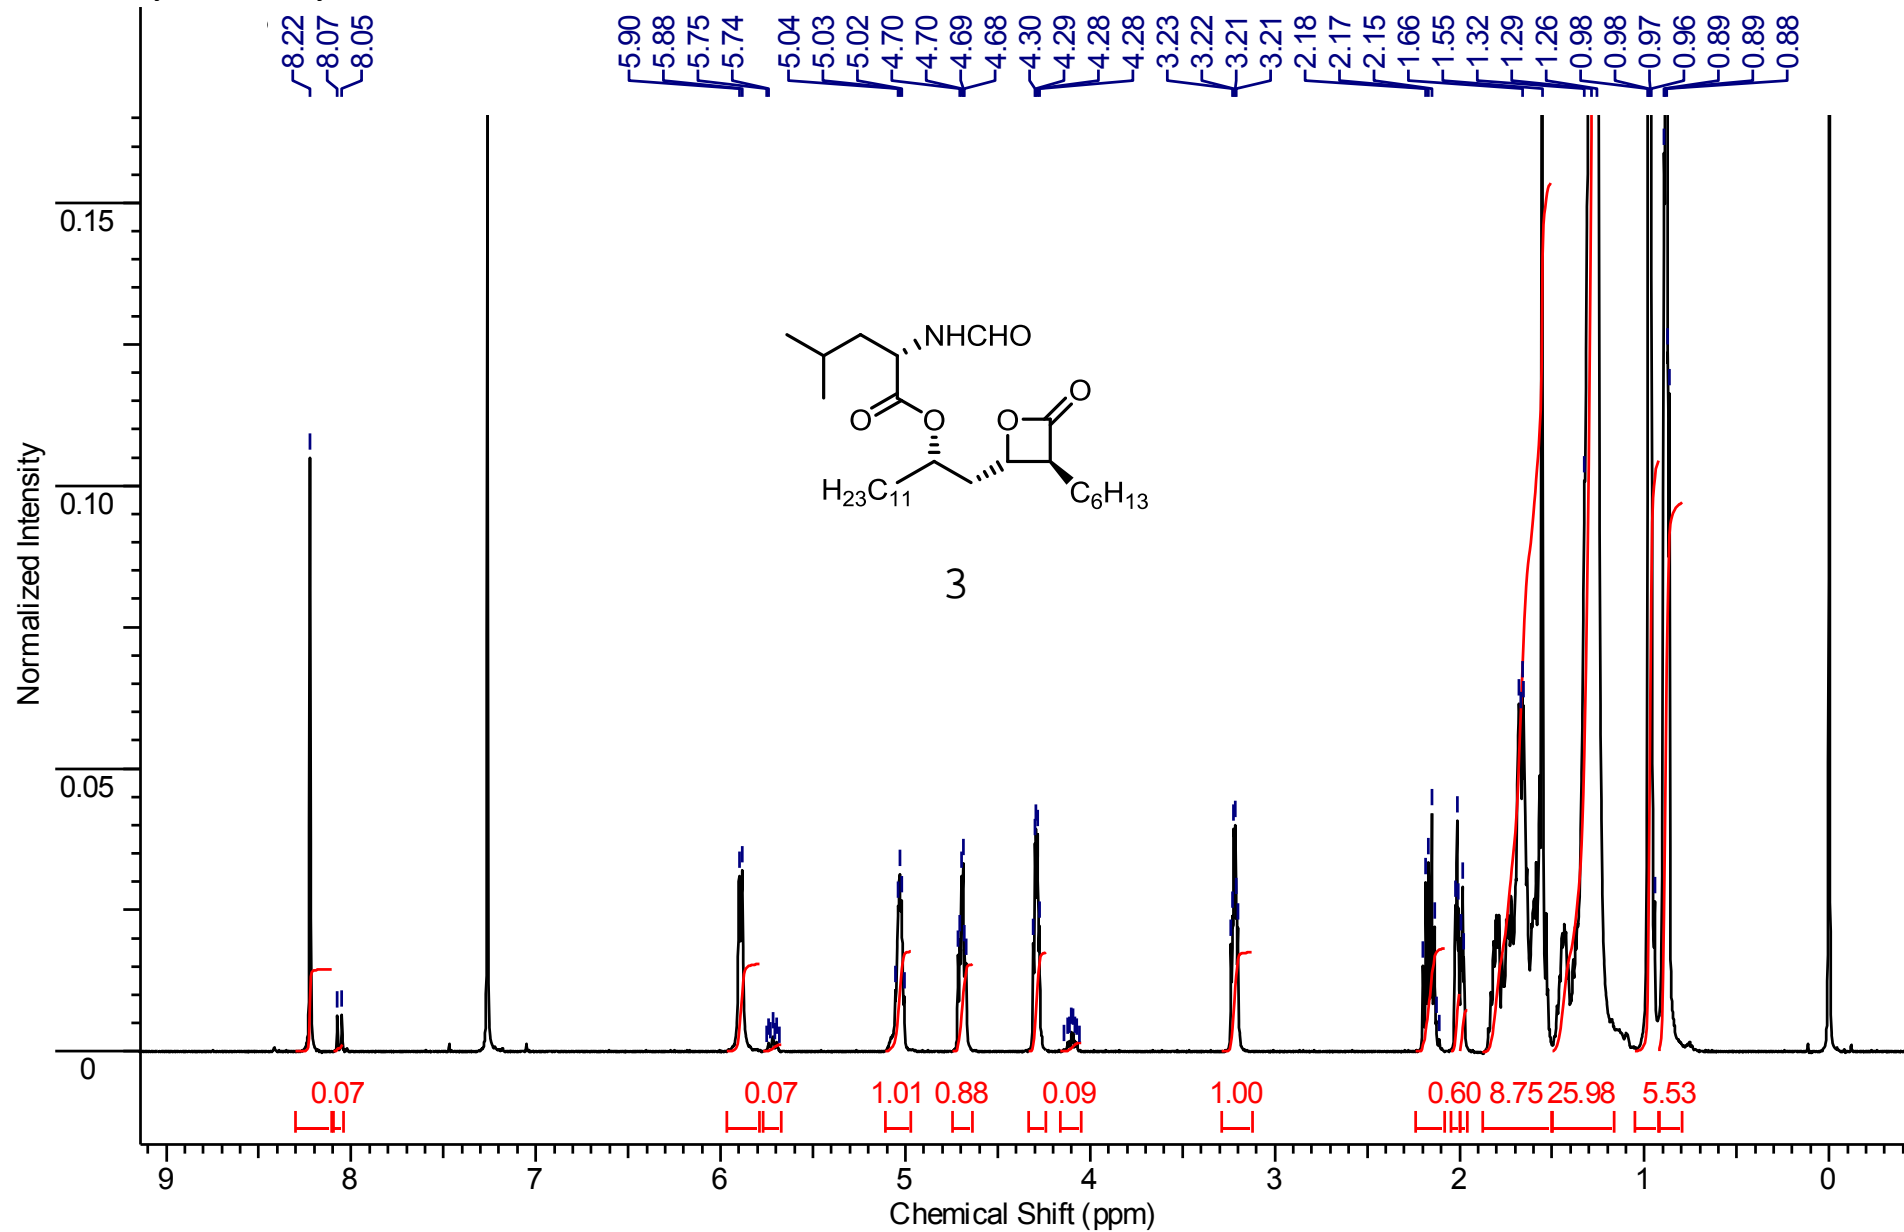

#### (4) *N*-formyl-L-isoleucyl analog

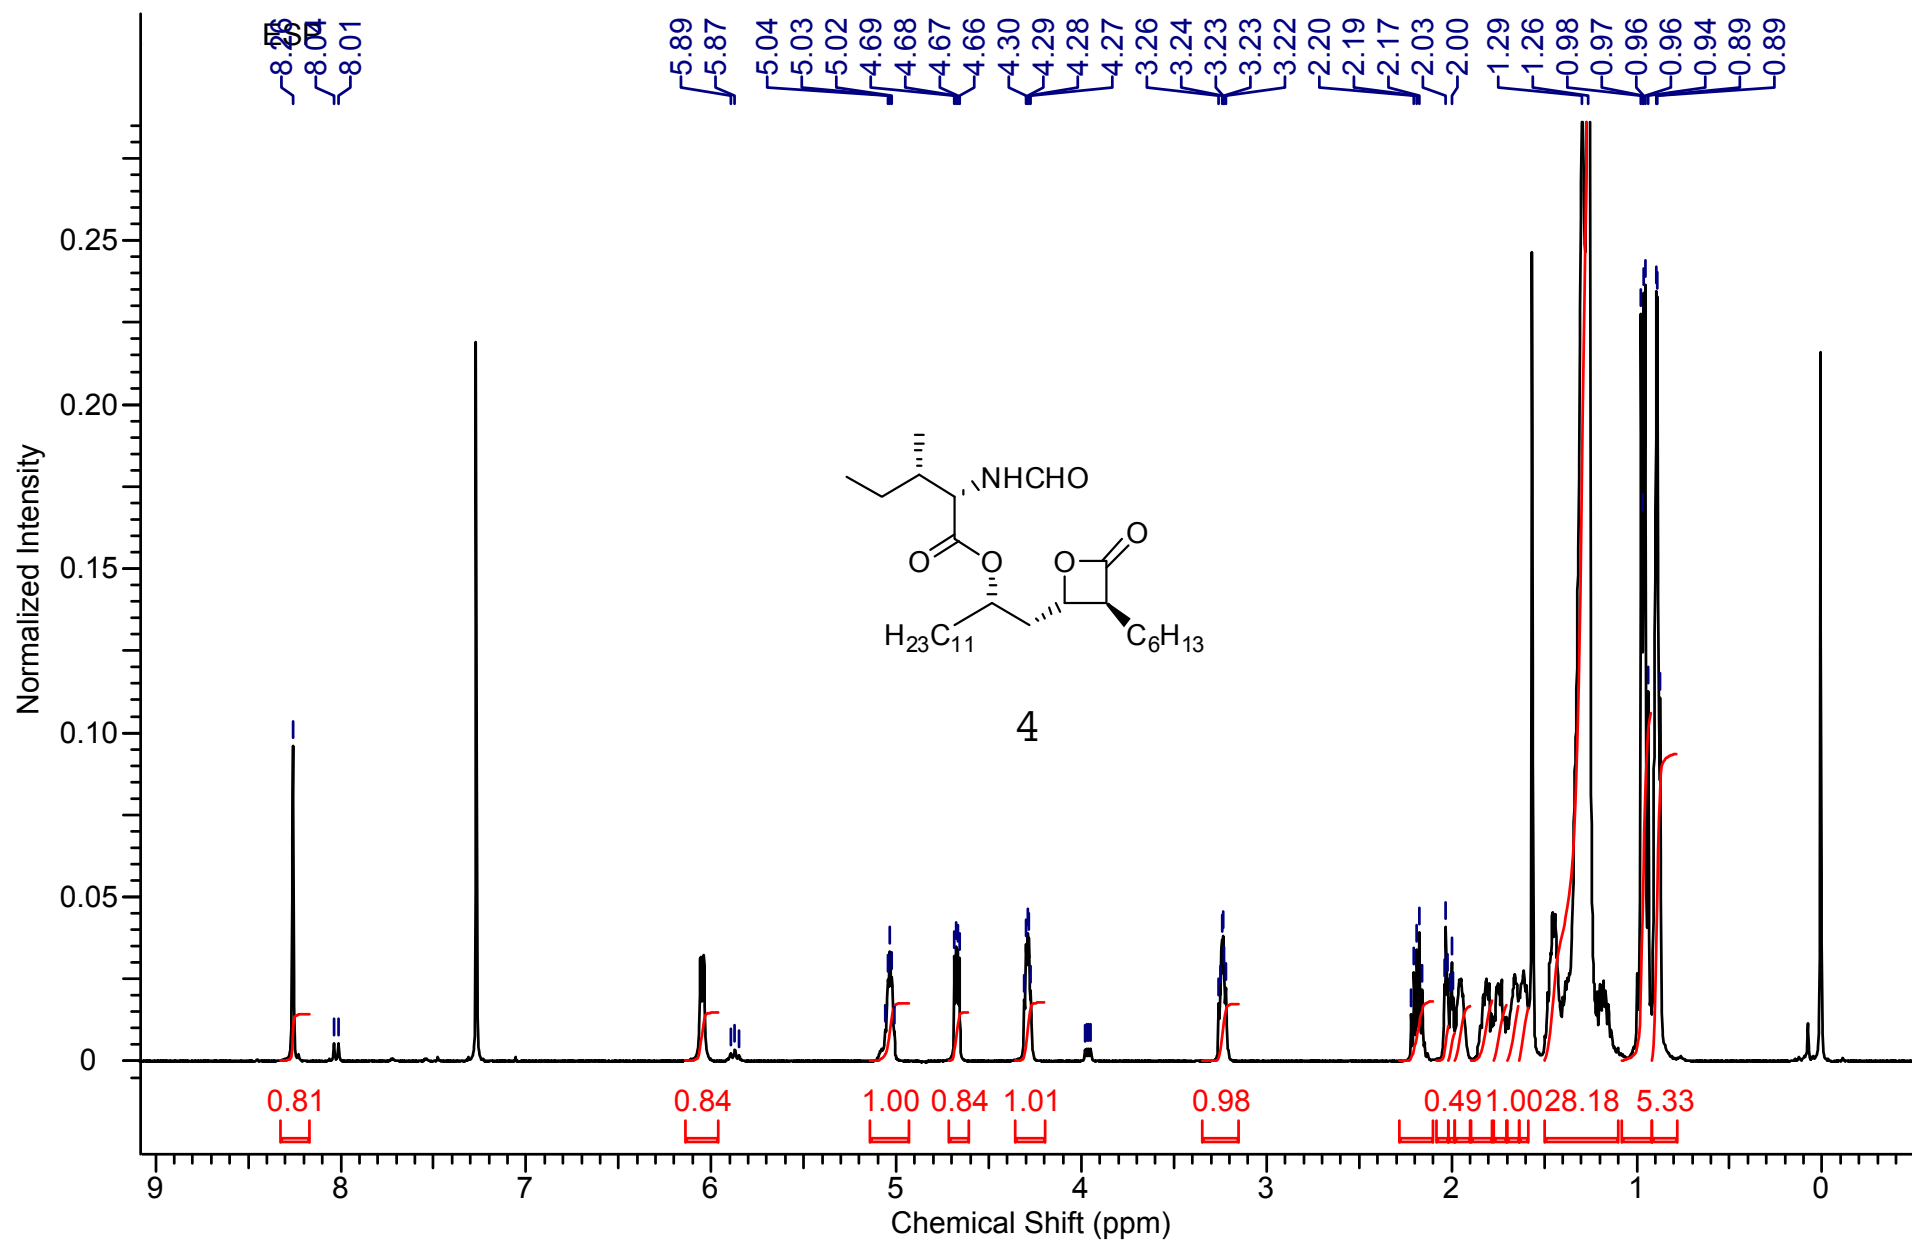



(5) *N*-formyl-L-*allo*-isoleucyl analog

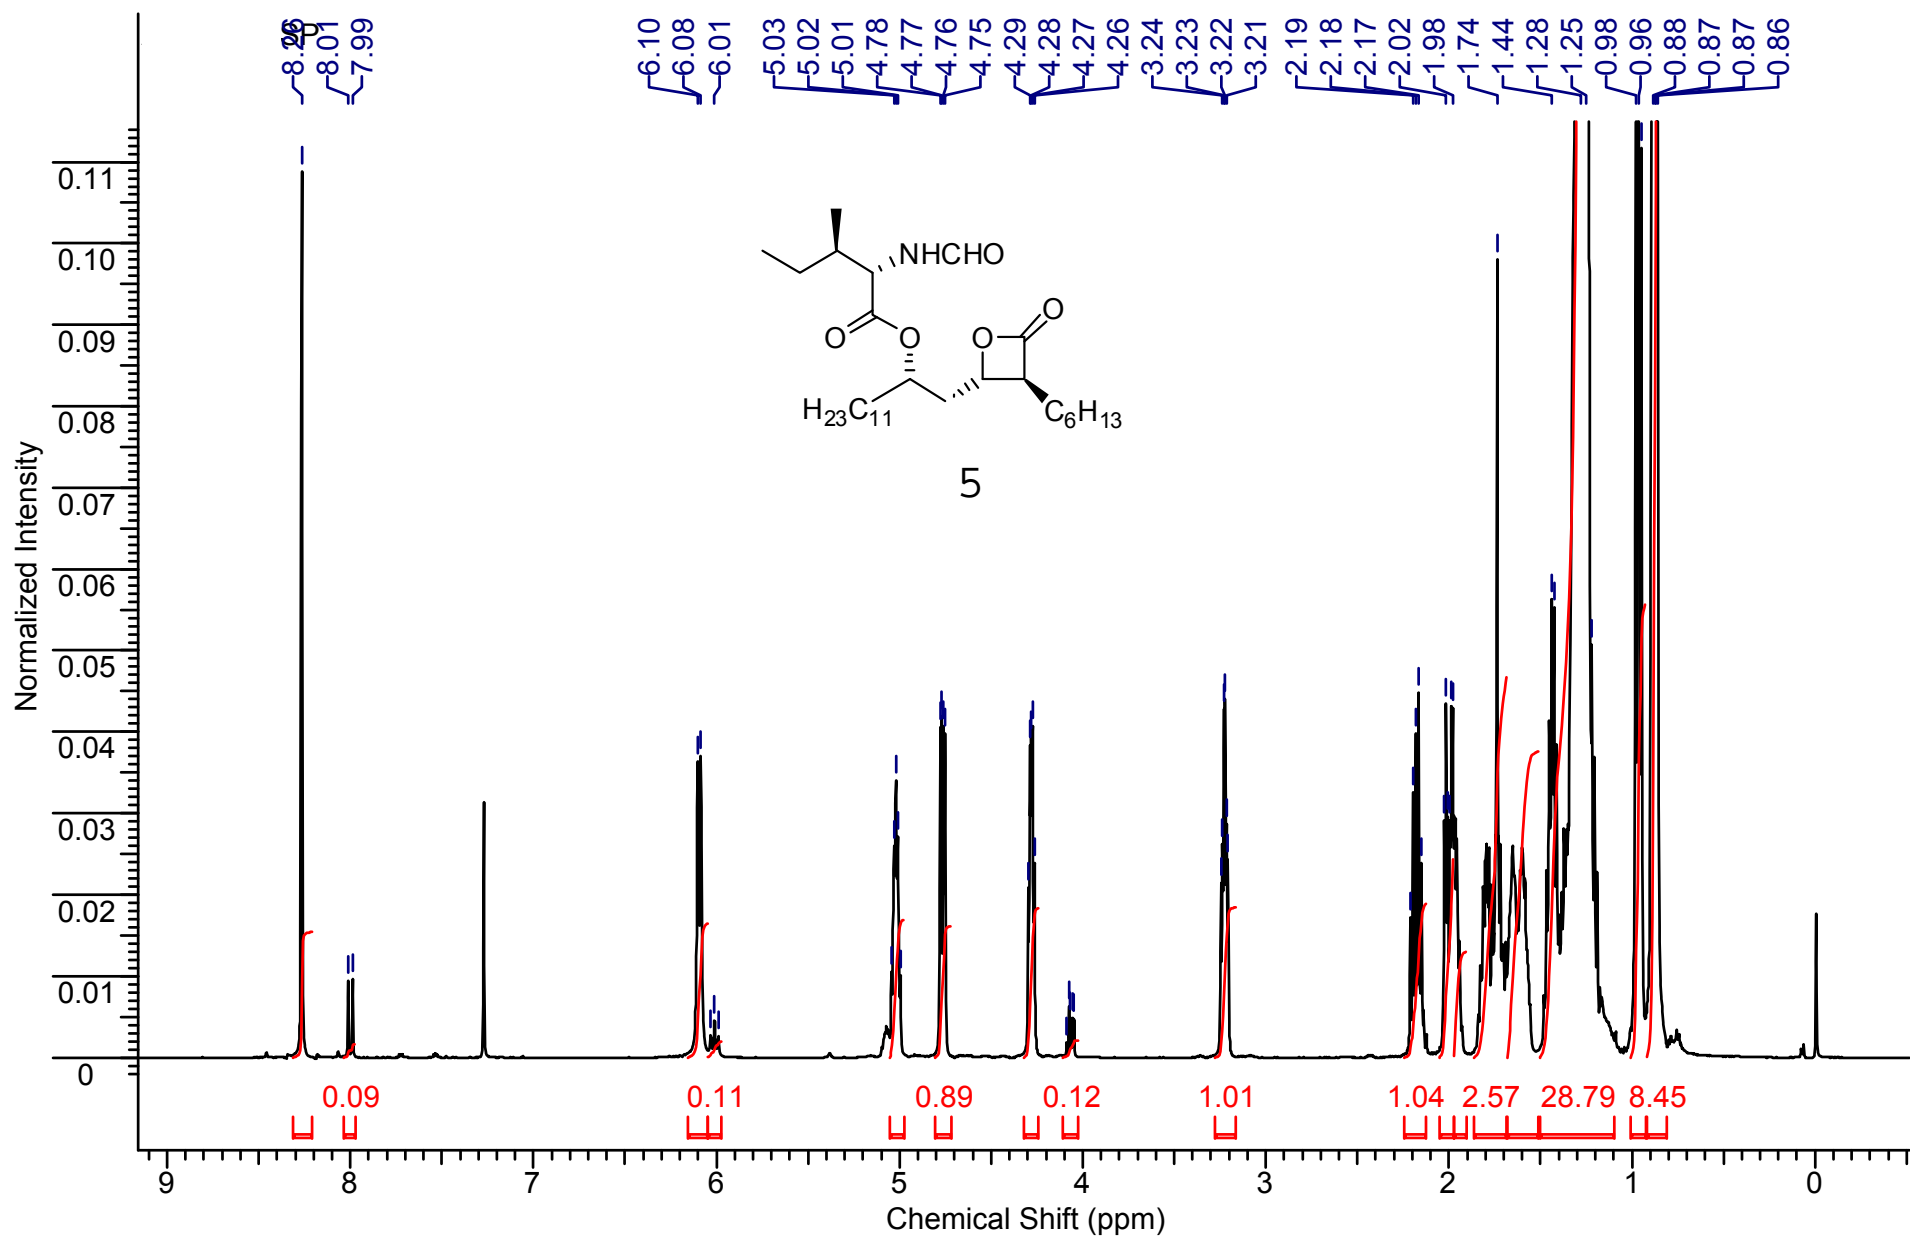

(6) *N*-formyl-**D**-isoleucyl analog

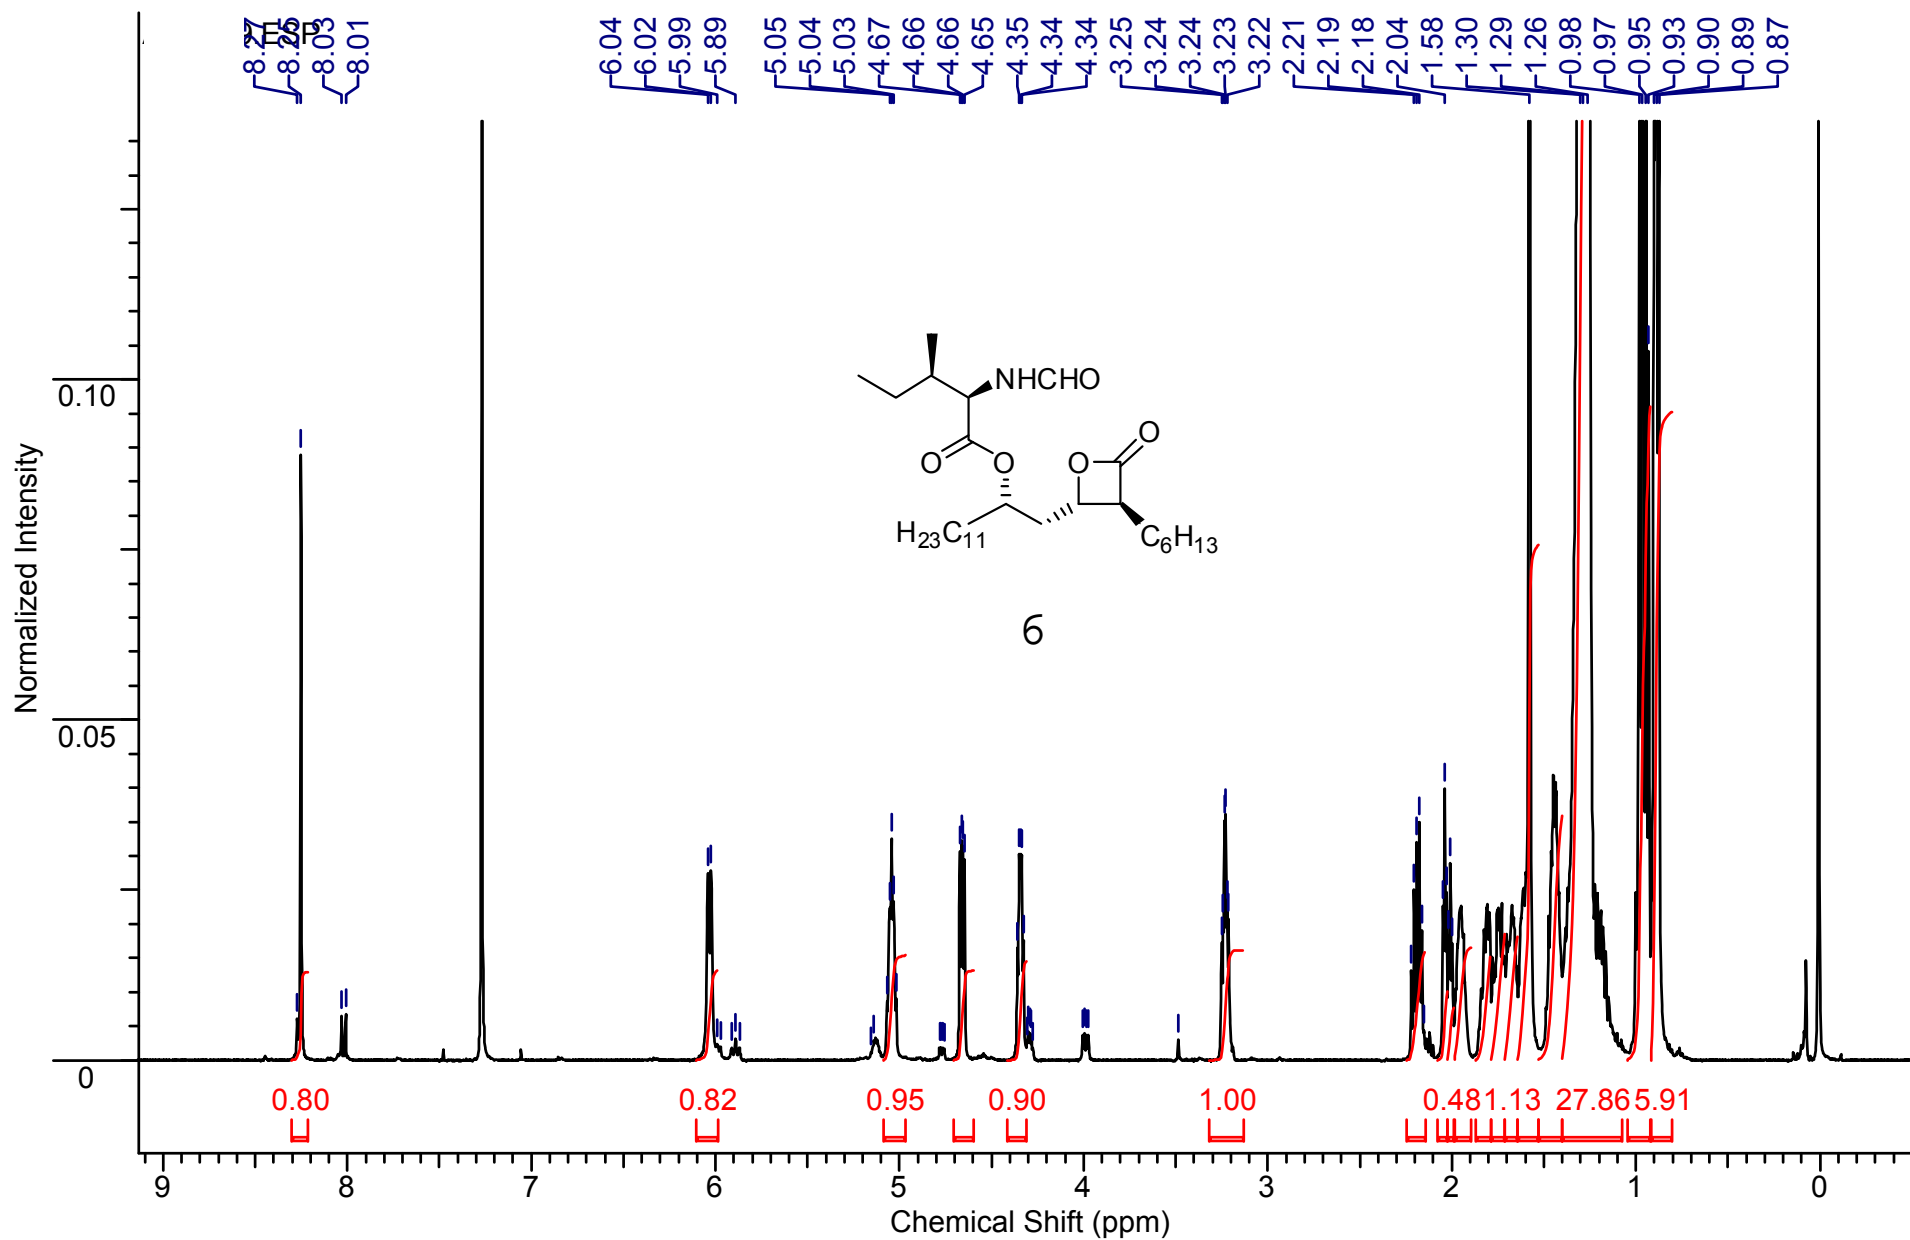

(7) *N*-formyl-**D**-*allo*-isoleucyl analog

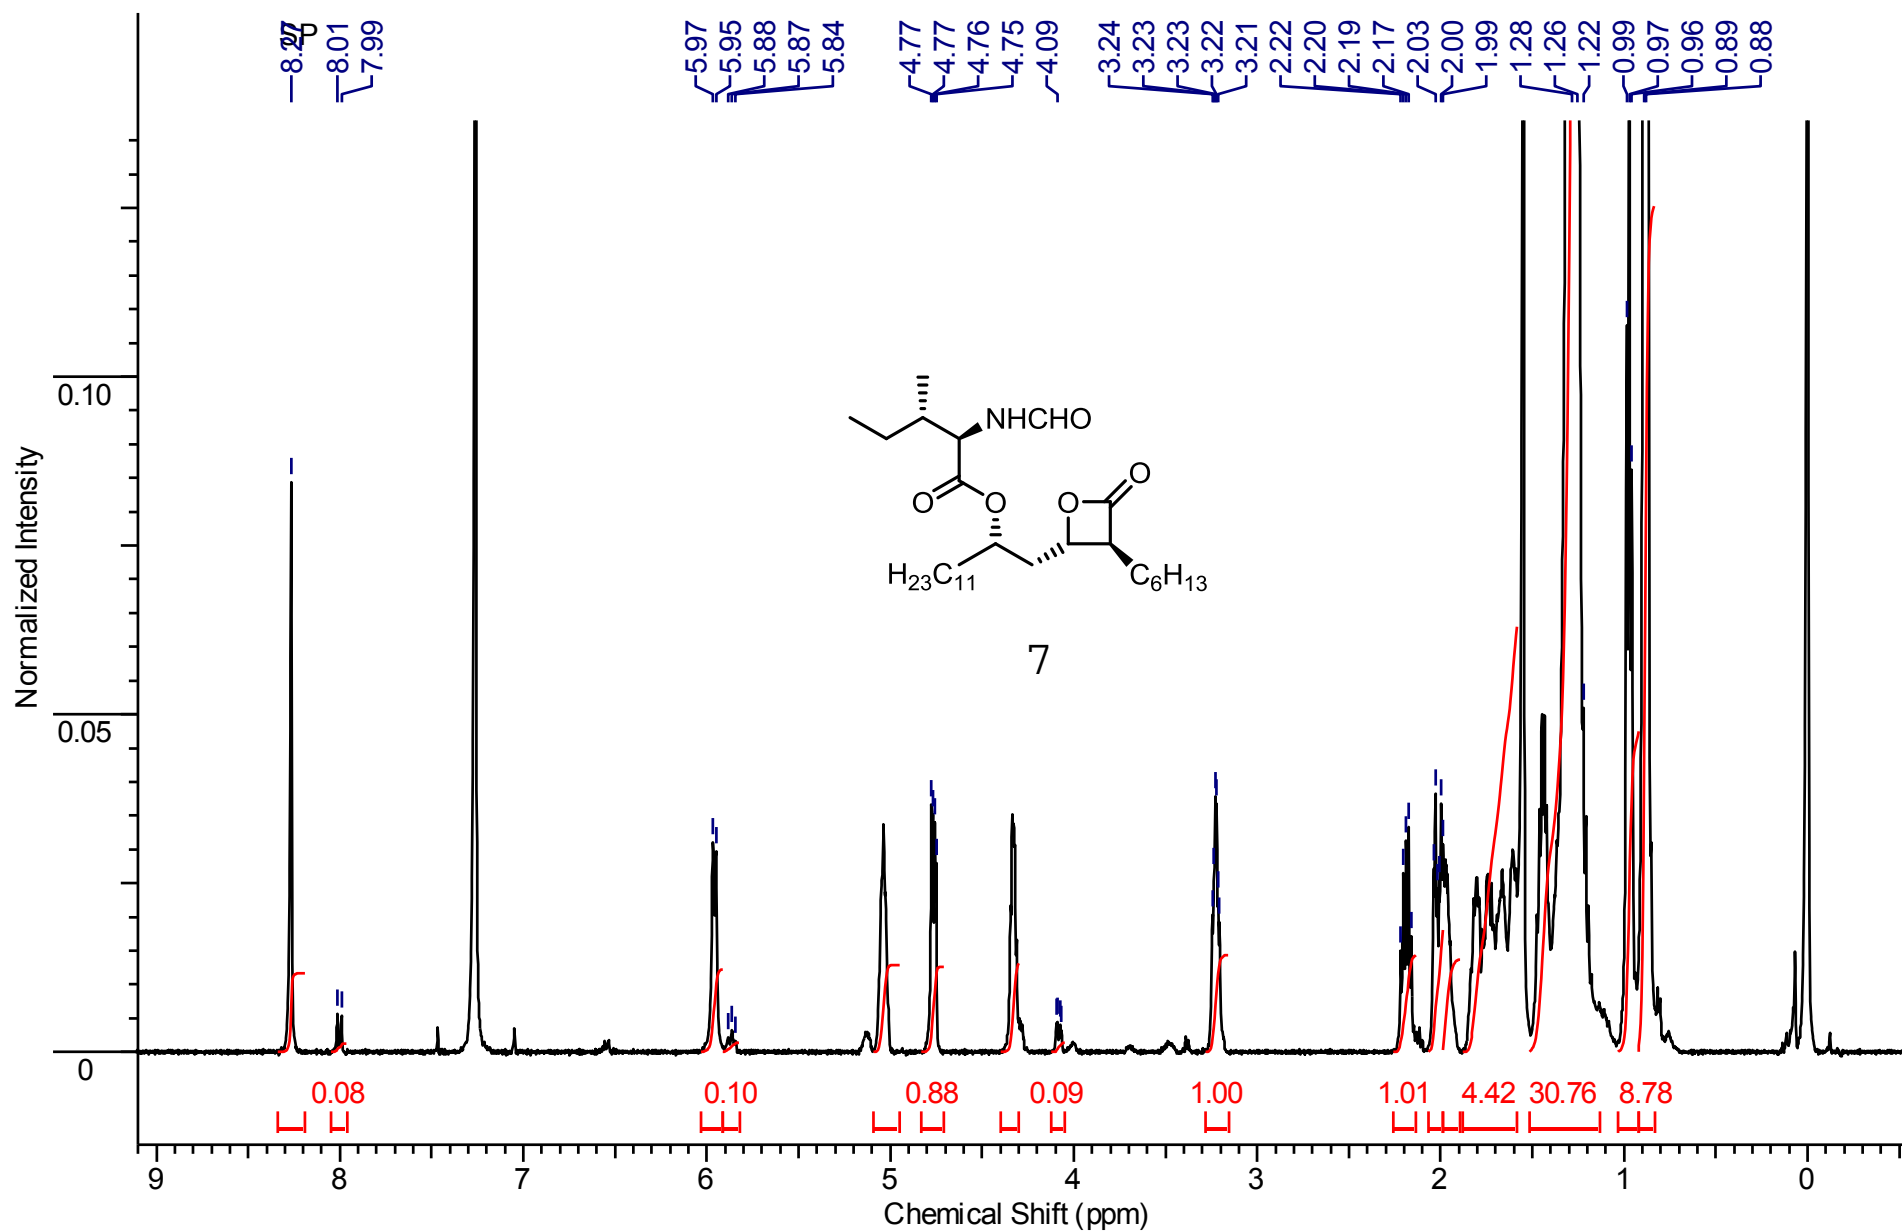

(8) (S)-N-formyl- $\alpha$ -aminobutyryl analog

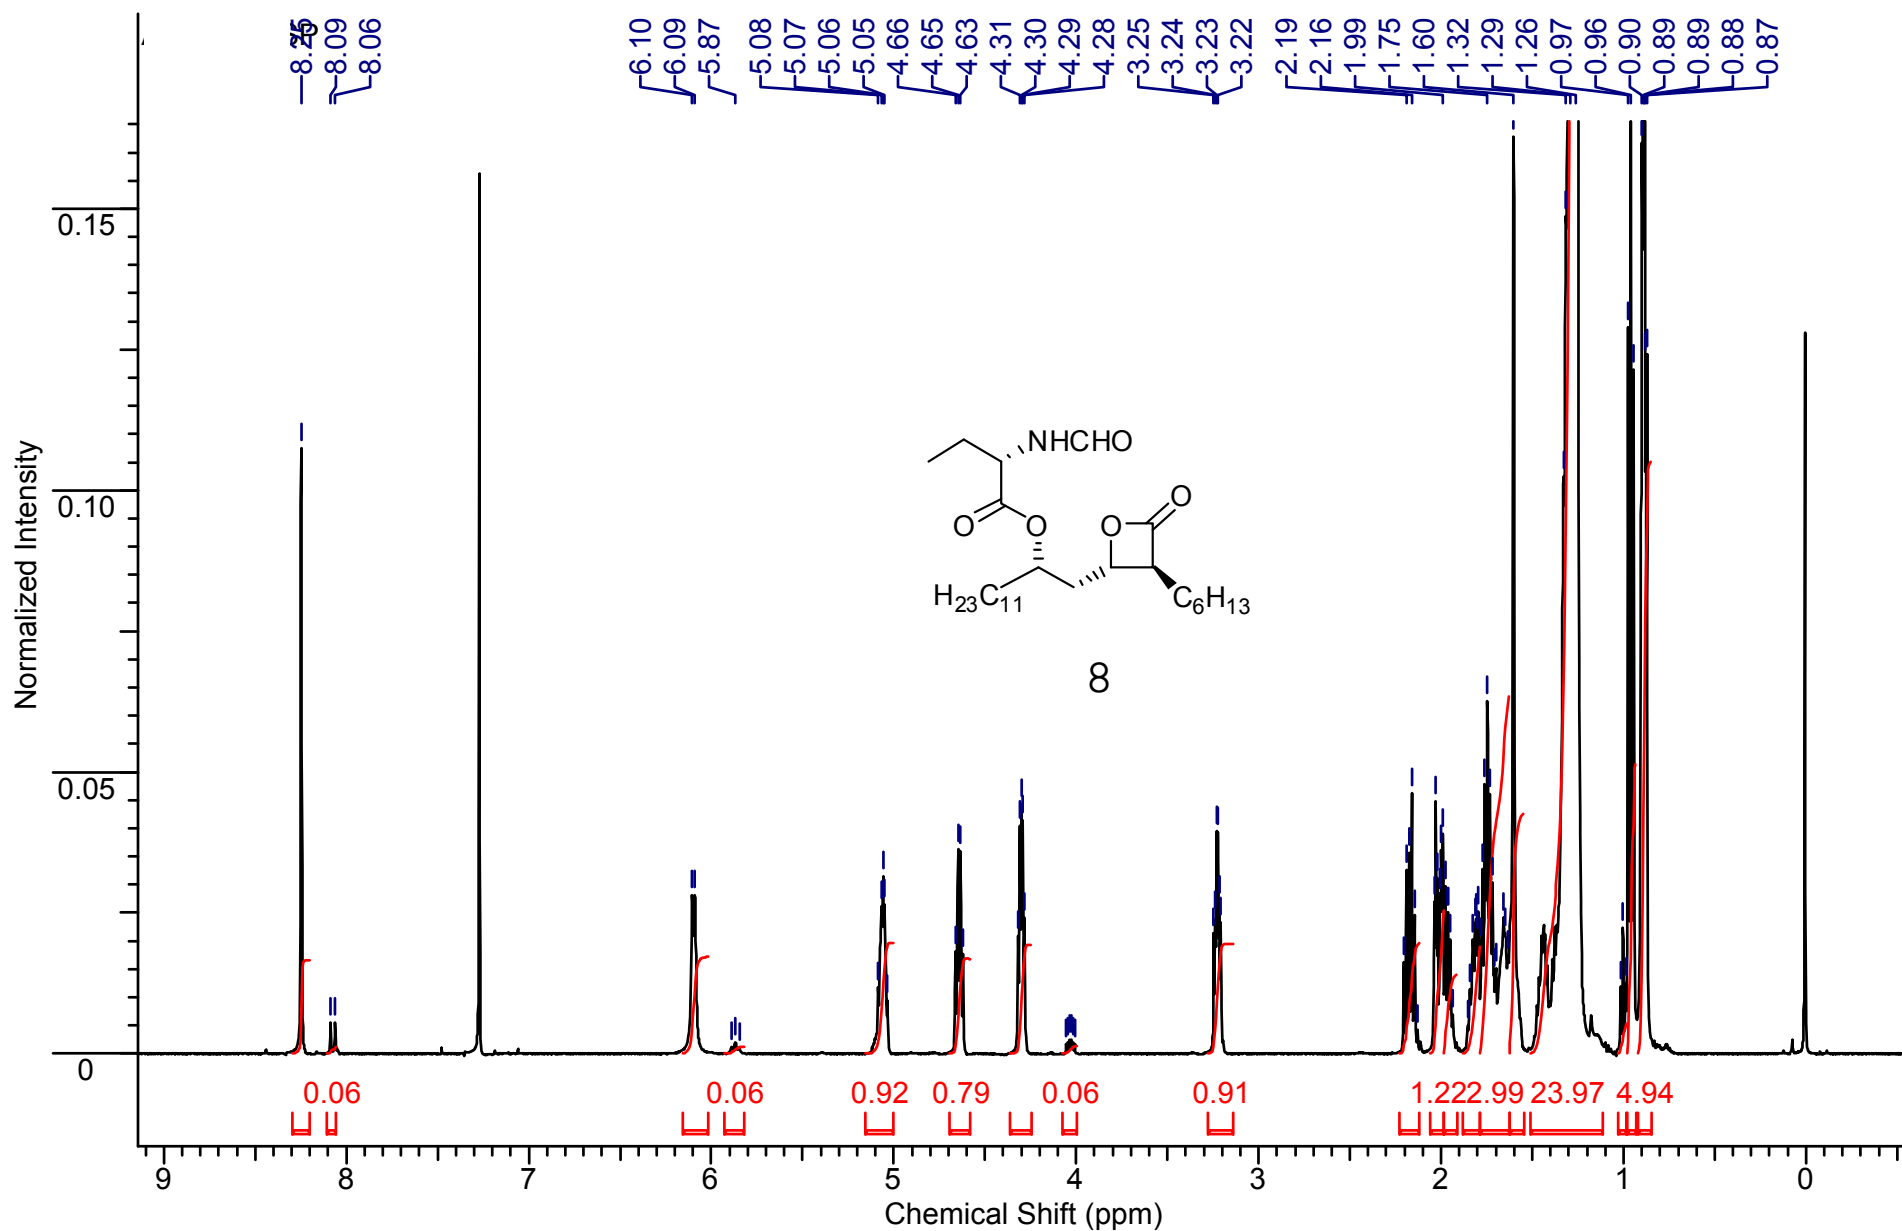

(9)  $\beta$ -lactone

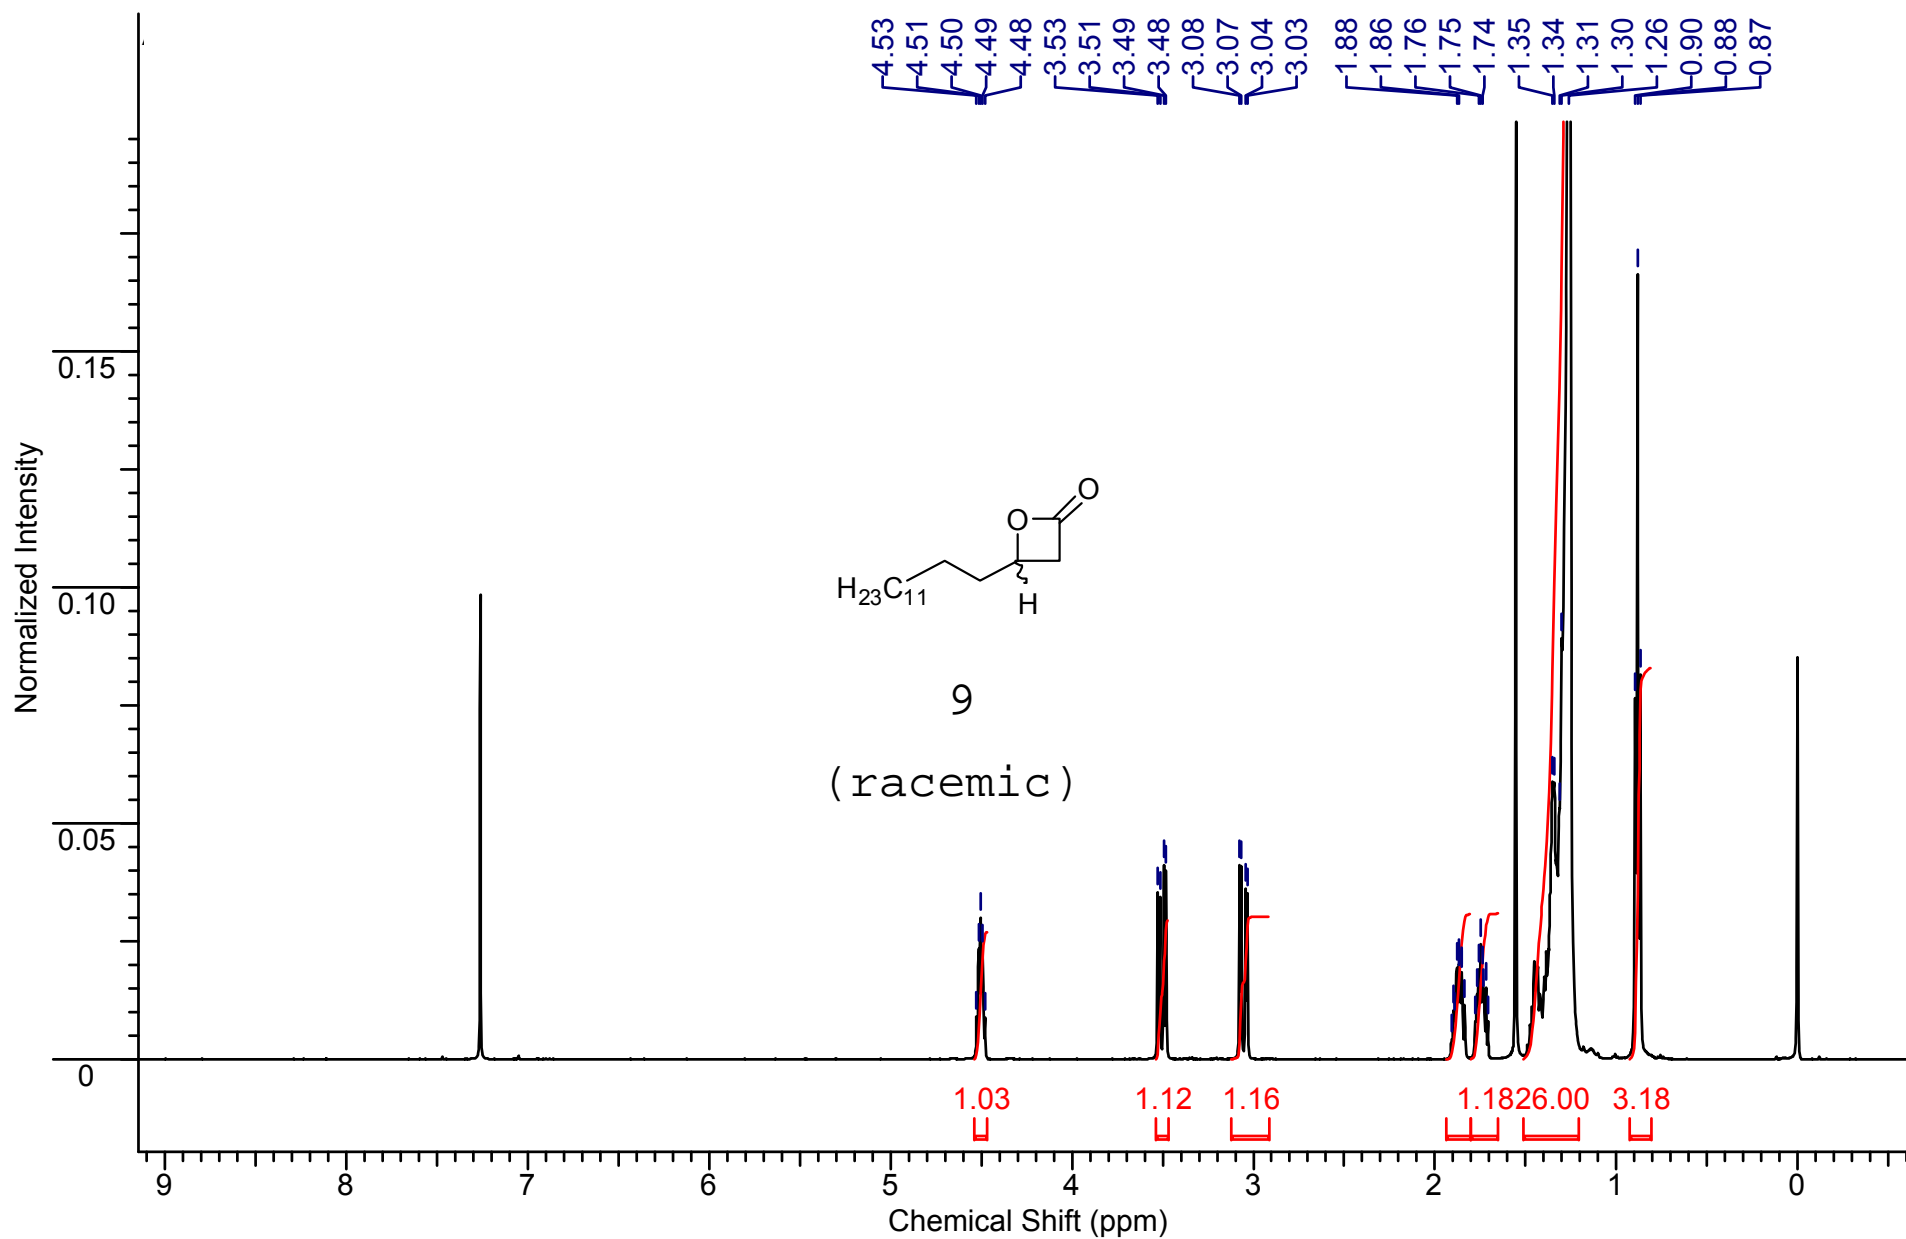

(10) trans  $\beta$ -lactone

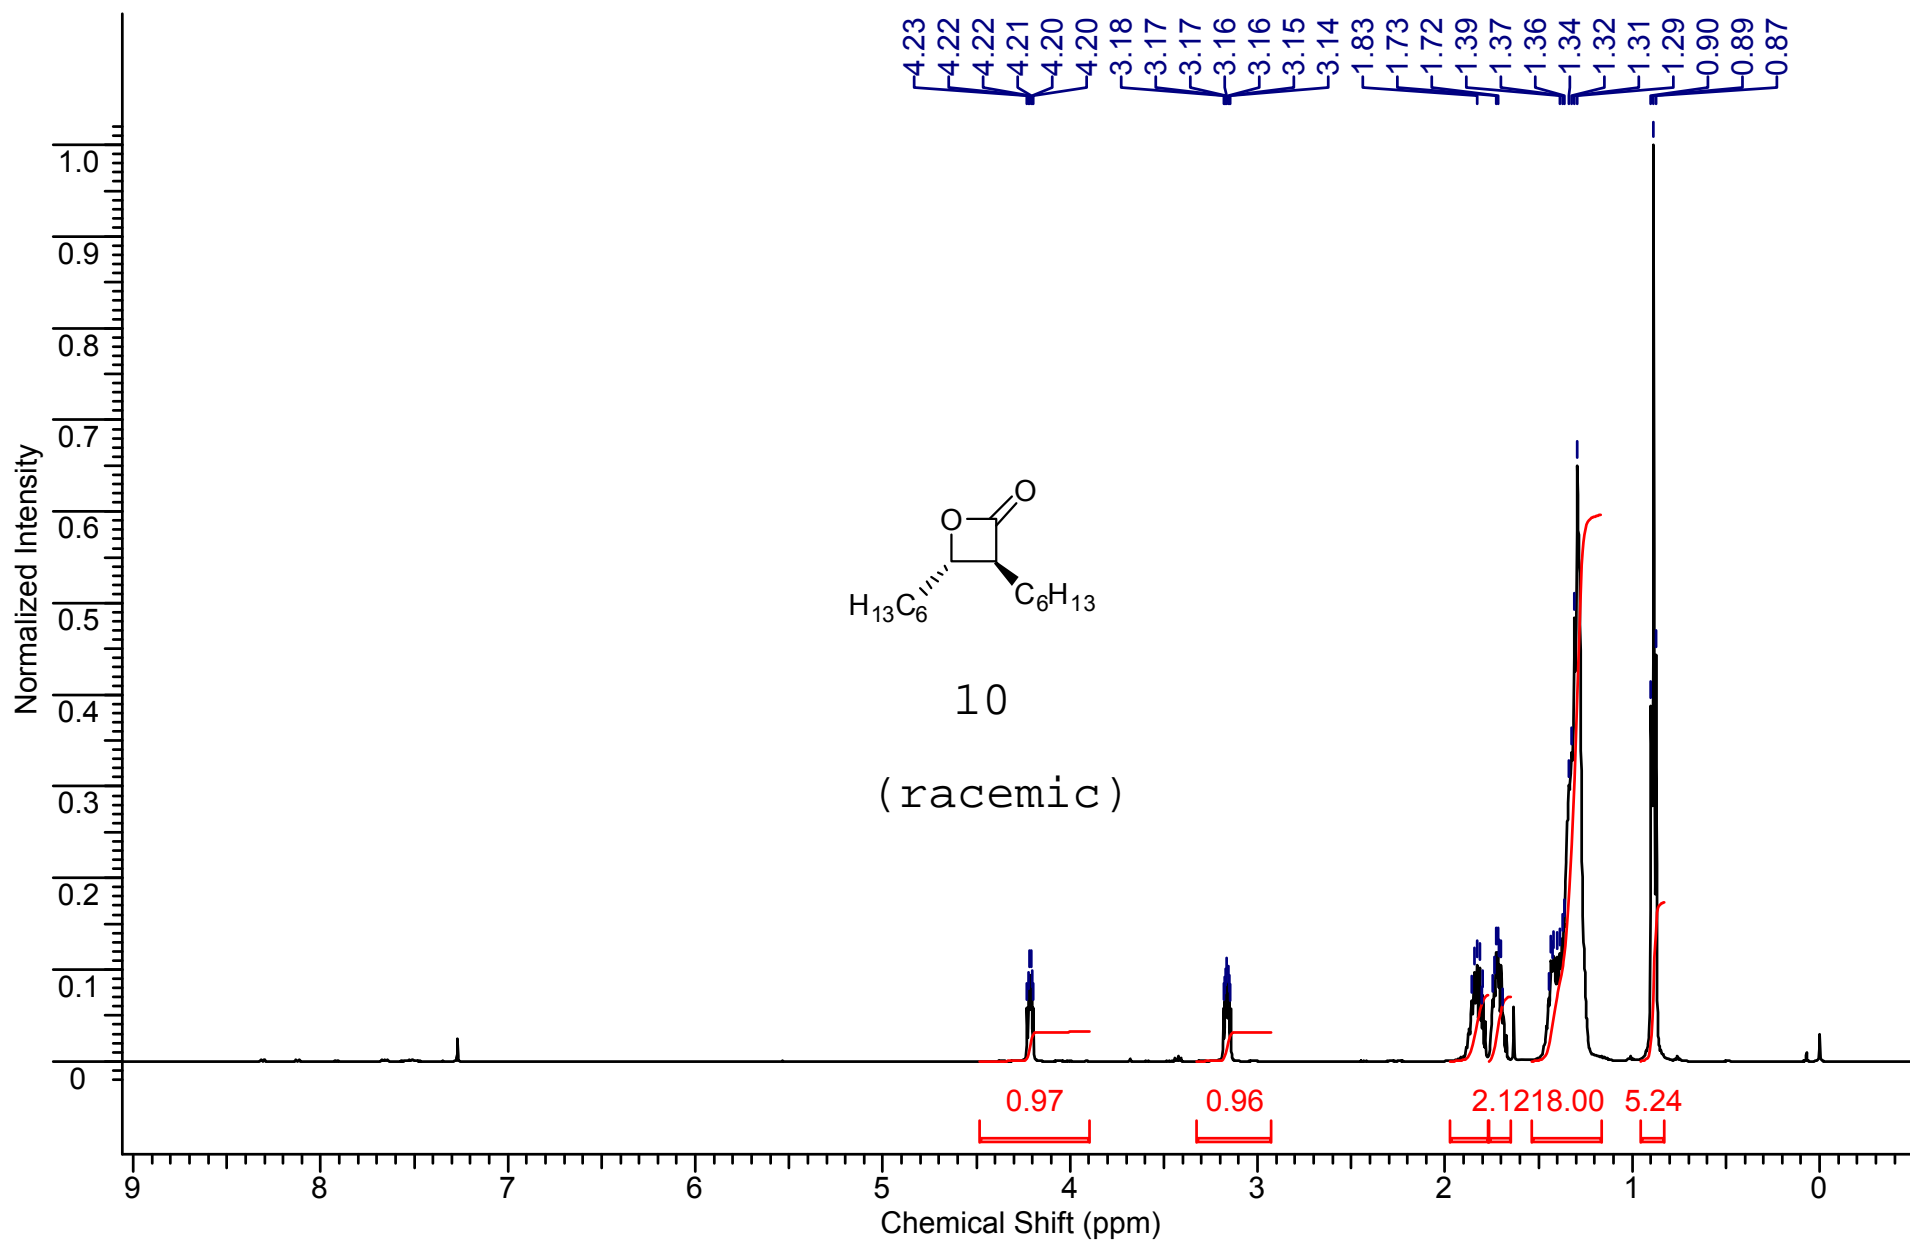

(11) cis  $\beta$ -lactone

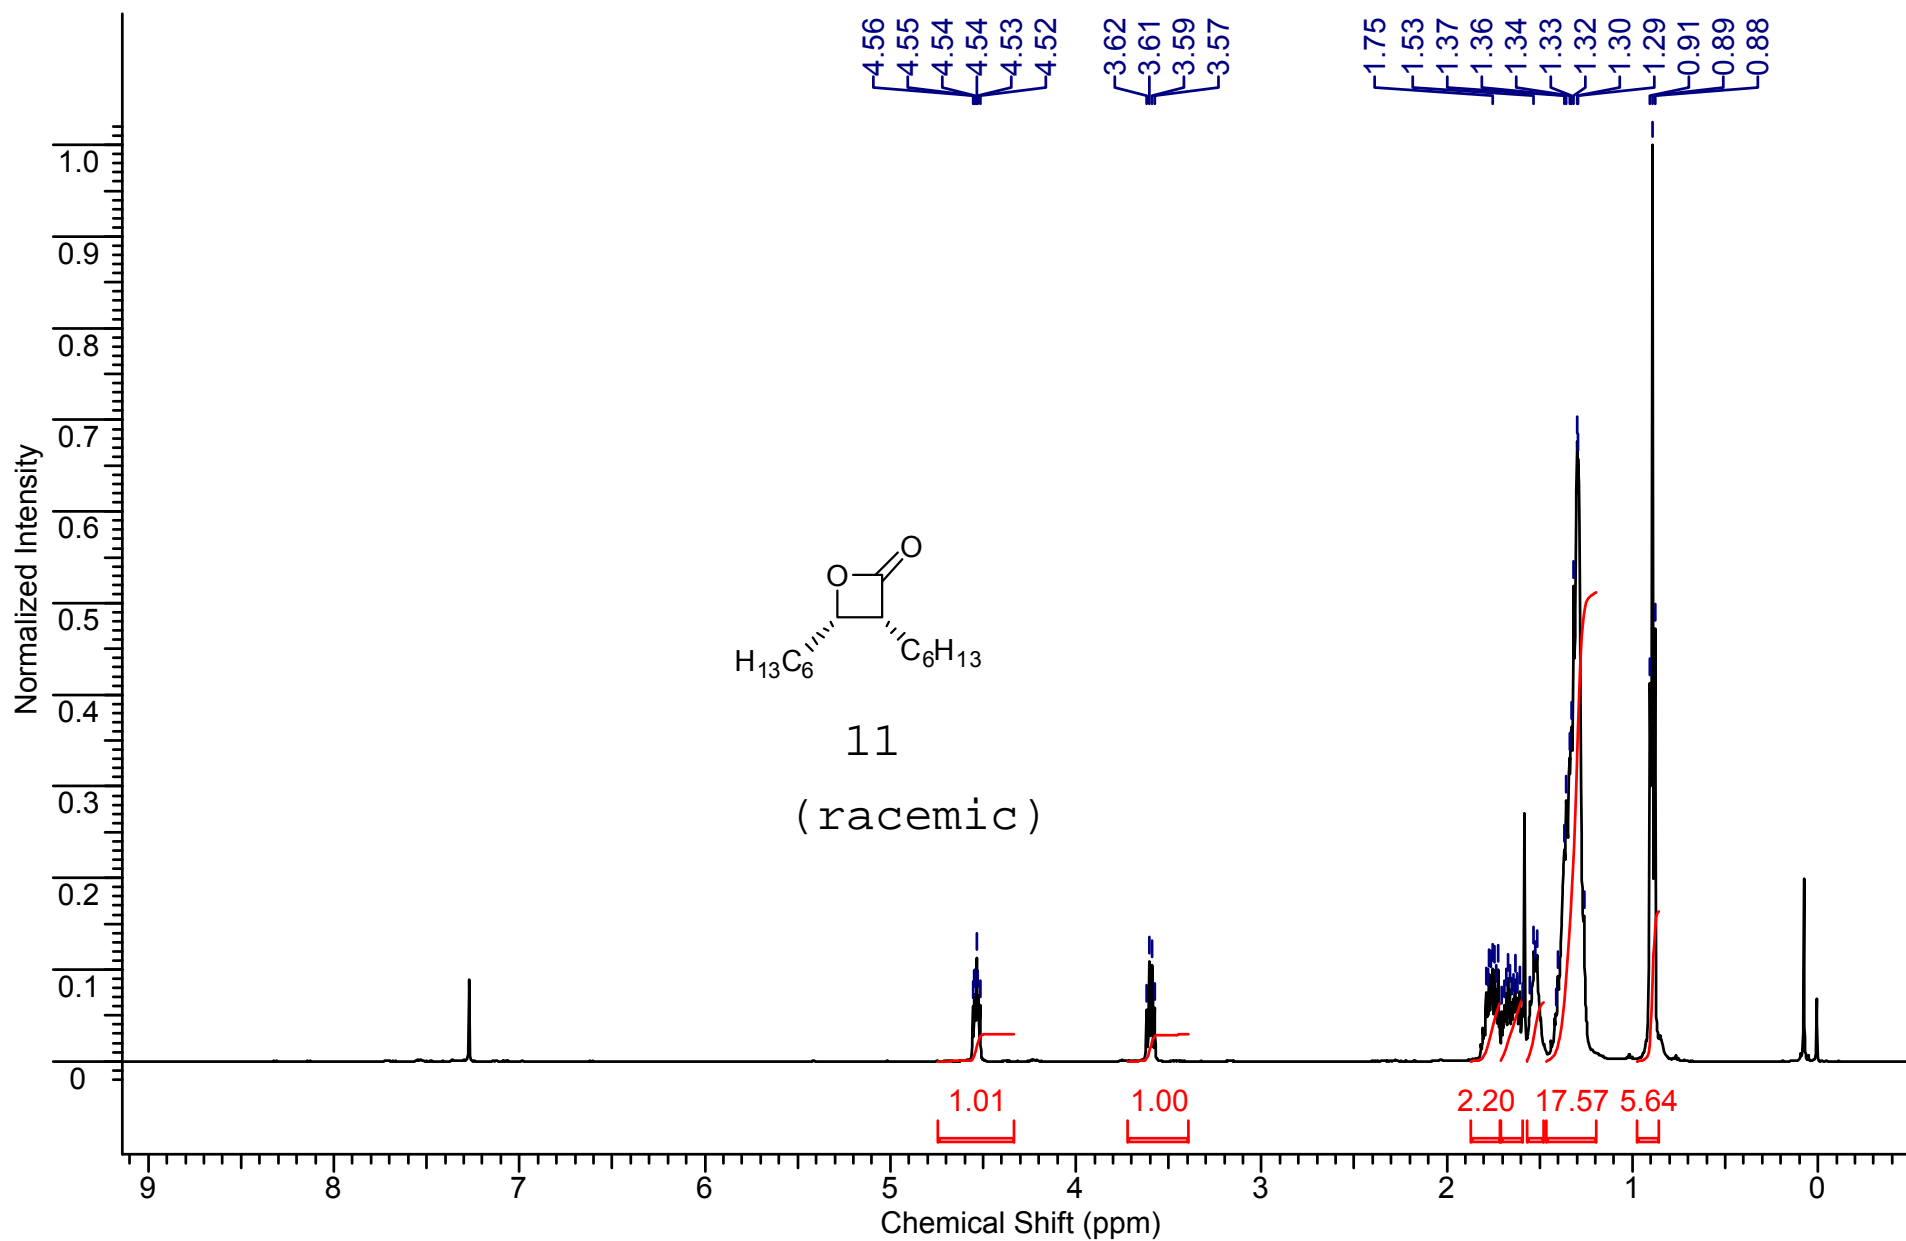

# (17) 1-DNP-2-pyrenyl ether lipid

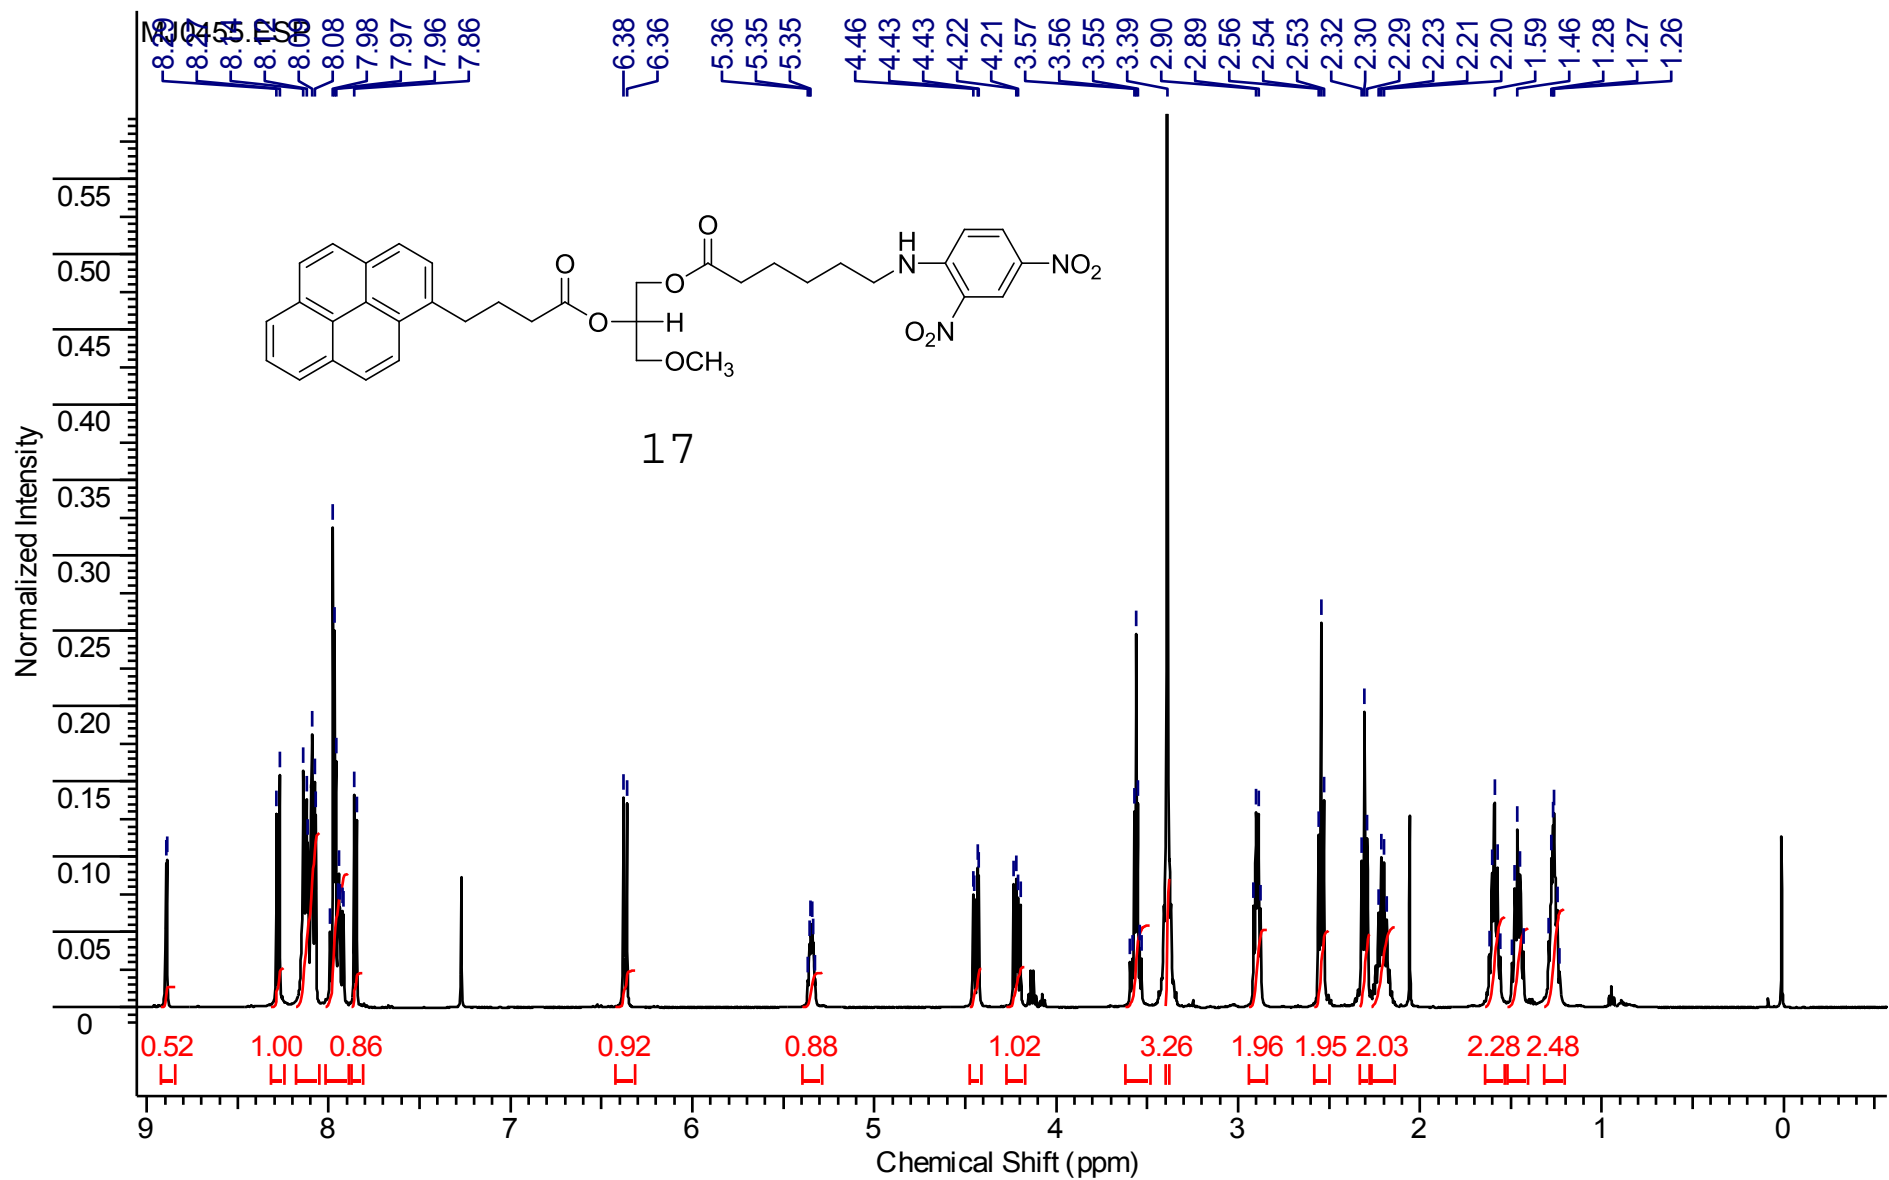



(18) 1-pyrenyl-2-DNP ether lipid

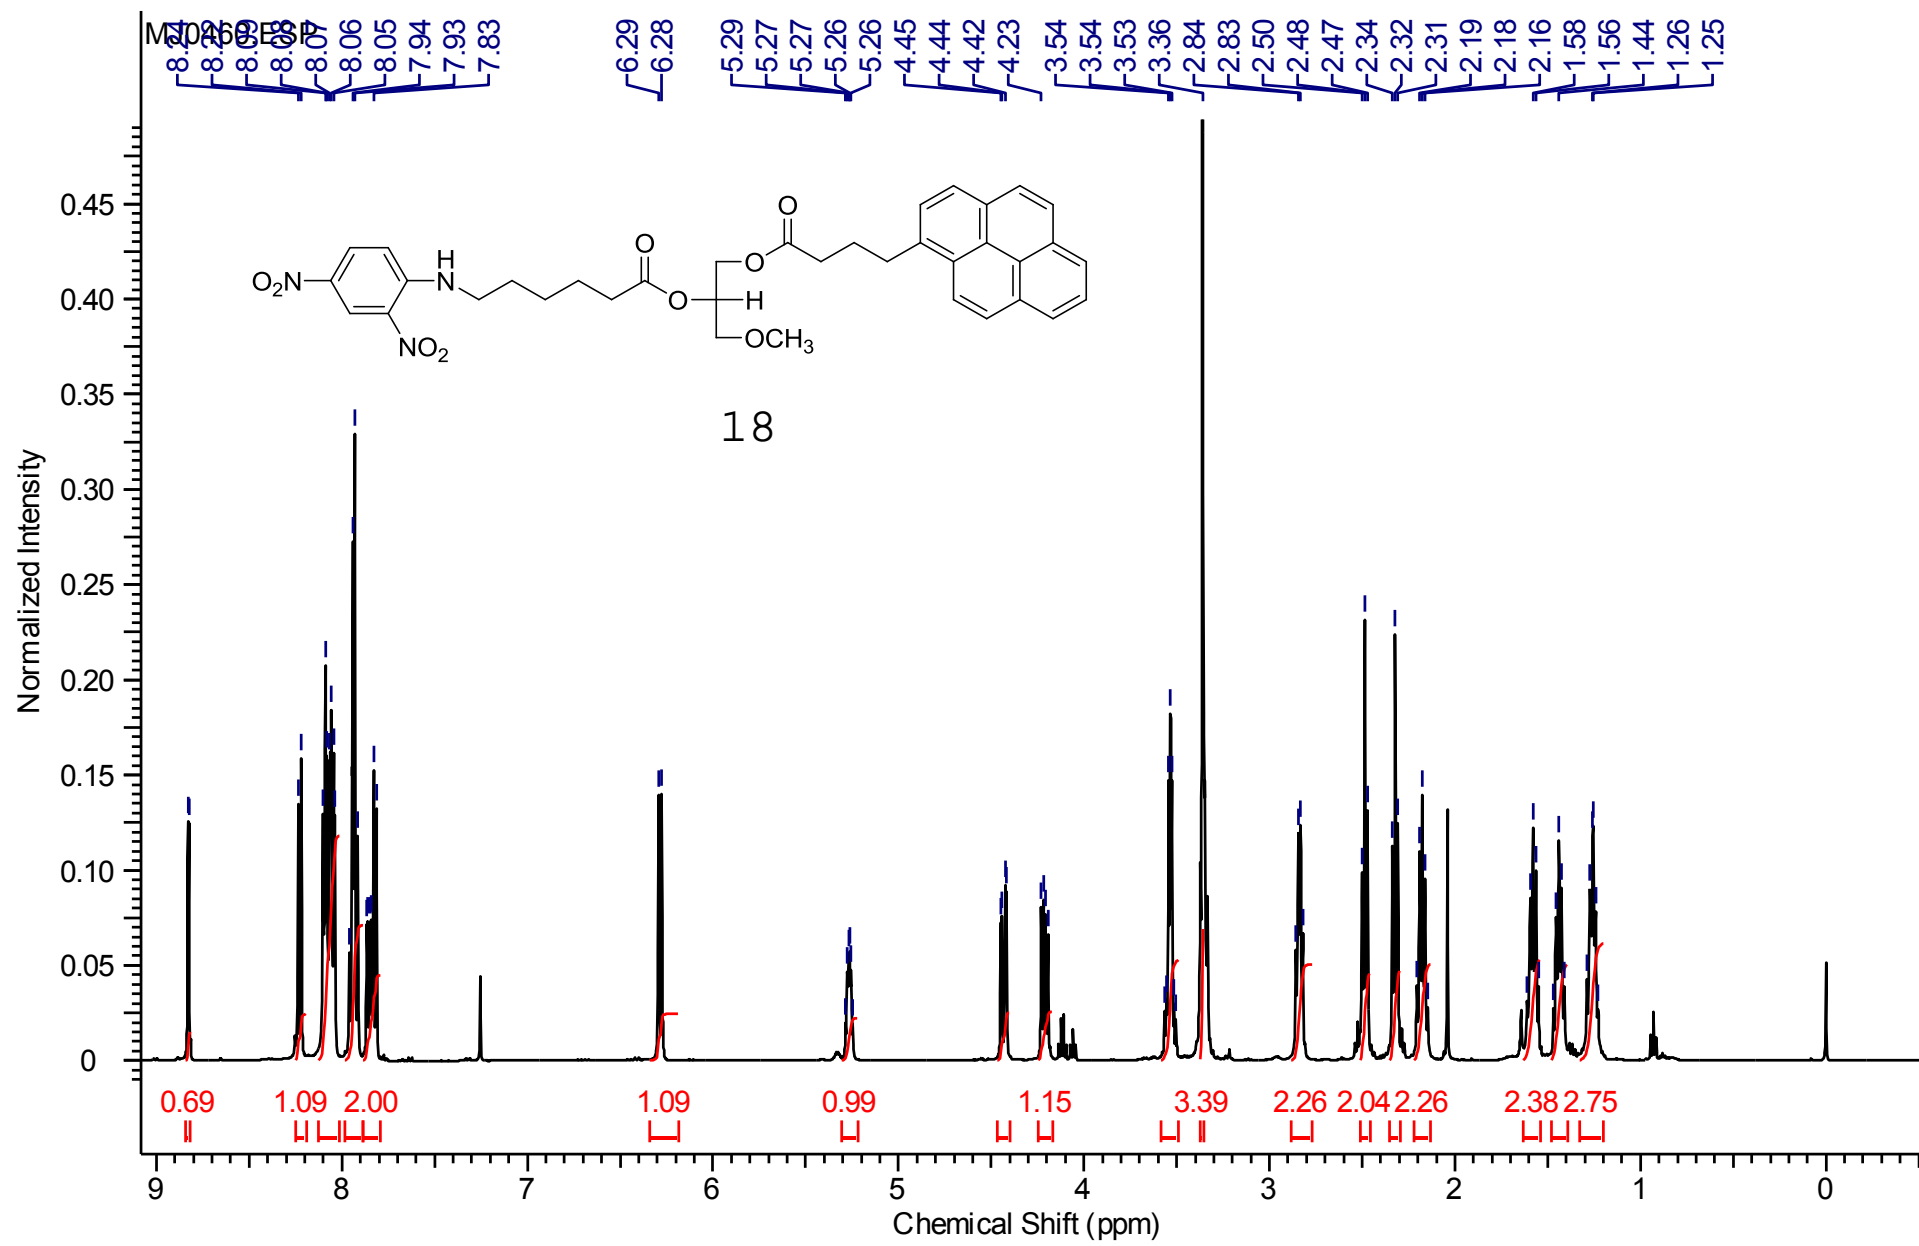

Supplement: NIHMS383142-supplement-01.pdf [file NIHMS383142-supplement-01.pdf]
